# Supplementary material for: Synthetic approach to iodosulfuron-methyl and metsulfuron-methyl metabolites and their application for water analysis
Source: Royal Society of Chemistry journal article supplement (doi:10.1039/d4ra01725k), 2024-01-01

Electronic supporting information for:

## Synthetic approach to iodosulfuron-methyl and metsulfuron-methyl metabolites and their application for water analysis

Marcin Rakowiecki<sup>a</sup>, Sylwia Studzińska<sup>b</sup>, Jacek Ścianowski<sup>b</sup>, Mariusz J. Bosiak<sup>c,d</sup>, Andrzej Wolan<sup>a,b</sup>, Marcin Budny<sup>\*,a</sup>

<sup>a</sup>Synthex Technologies Sp. z o.o., Gagarina 7/134B, 87-100 Toruń, Poland. <sup>b</sup> Department of Environmental Chemistry and Bioanalytics, Faculty of Chemistry, Nicolaus Copernicus University, Gagarina 7, 87-100 Toruń, Poland. <sup>c</sup> Department of Organic Chemistry, Faculty of Chemistry, Nicolaus Copernicus University, Gagarina 7, 87-100 Toruń, Poland, <sup>d</sup> Noctiluca S.A., Gagarina 7/41B, 87-100 Toruń, Poland.

### Table of contents

|                                                                                         |   |
|-----------------------------------------------------------------------------------------|---|
| <b>Scheme S1.</b> Plausible MS/MS fragmentations of <b>3/4</b> and <b>6/7</b> .....     | 2 |
| <b>Figure S1.</b> ESI MS/MS chromatograms of compounds <b>1-13</b> .....                | 3 |
| <b>Table S1.</b> Retention times and MRM conditions for compounds <b>1-13</b> .....     | 4 |
| <b>Table S2.</b> Analytical parameters for determination of compounds <b>1-13</b> ..... | 5 |
| <sup>1</sup> H NMR and <sup>13</sup> C NMR spectra .....                                | 6 |

### Scheme S1. Plausible MS/MS fragmentations of 3/4 and 6/7

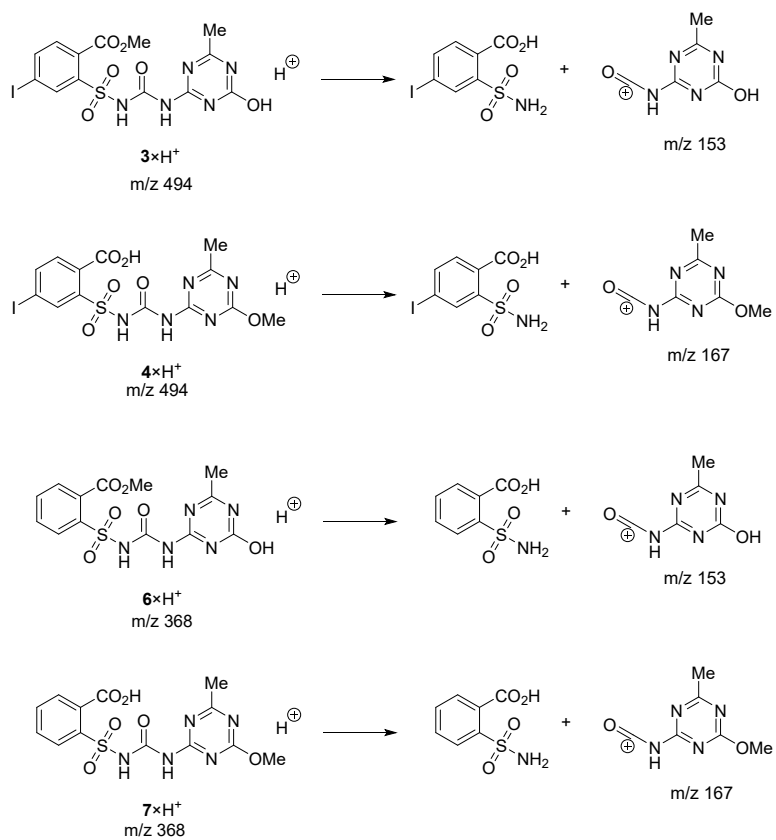

**Figure S1.** ESI MS/MS chromatograms of compounds 1-13

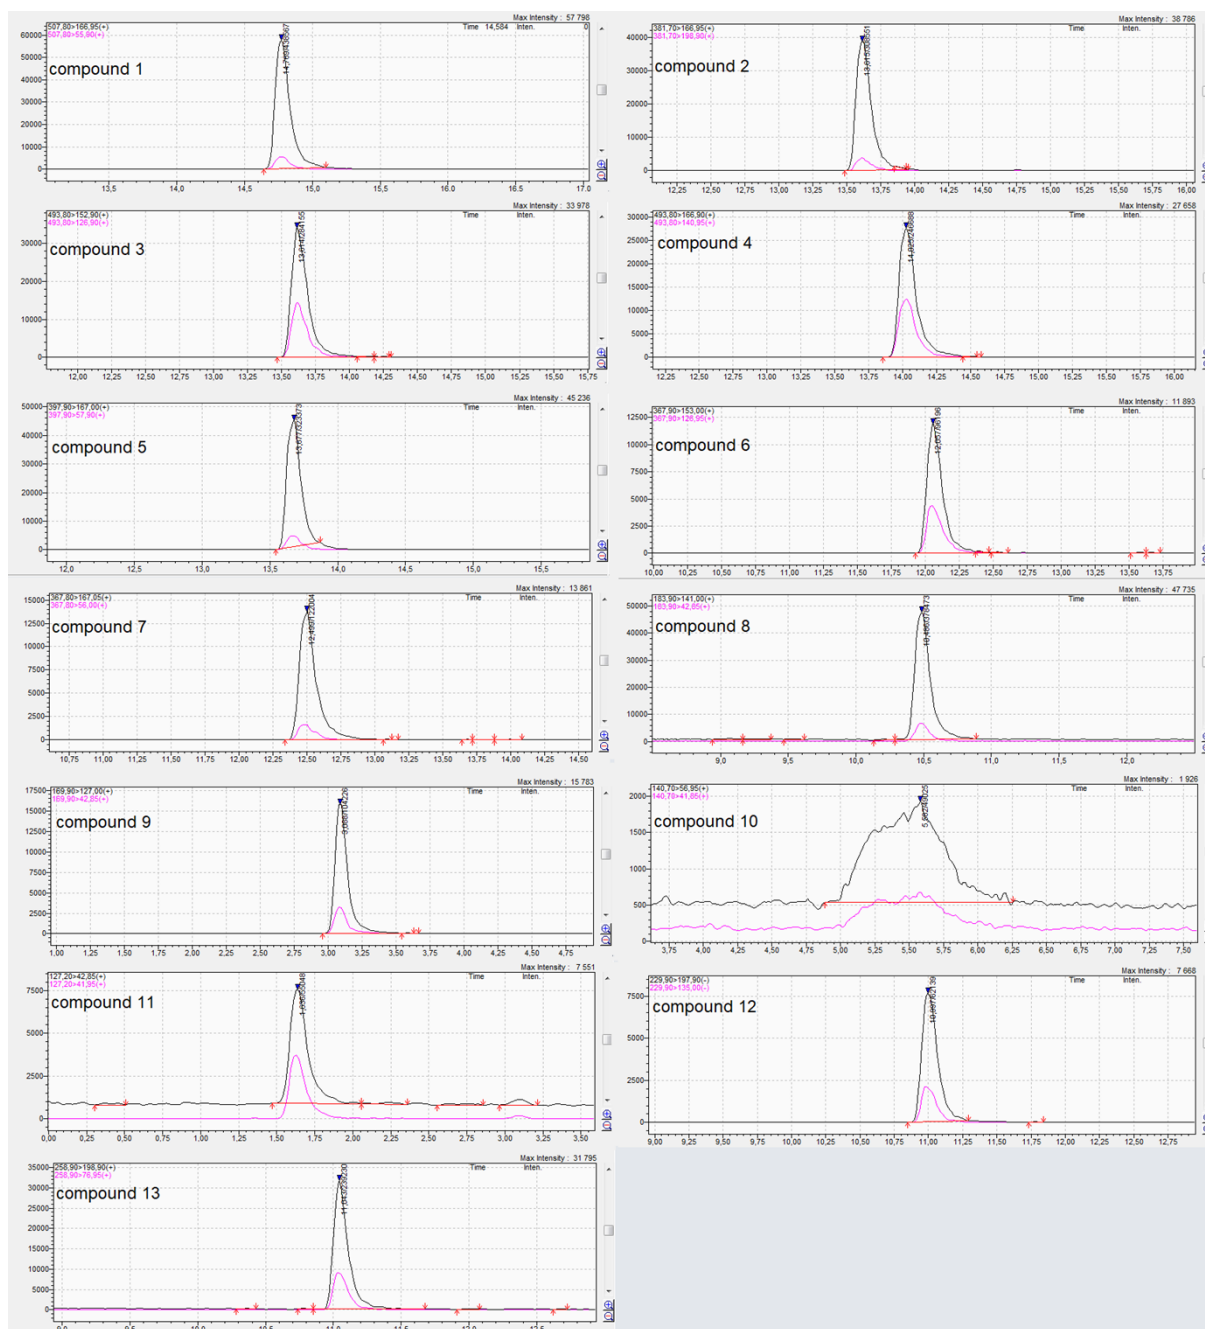

**Table S1.** Retention times and MRM conditions for compounds **1-13**.

| Compound               | Retention time [min] | Precursor ion | Product ions | Dwell time [ms] | Q1 [V] | CE    | Q3 [V] |
|------------------------|----------------------|---------------|--------------|-----------------|--------|-------|--------|
| <b>1</b>               | 14.90                | 507.80        | 166.95       | 56.0            | -26.0  | -25.0 | -28.0  |
|                        |                      |               | 55.90        | 56.0            | -26.0  | -55.0 | -20.0  |
| <b>2</b>               | 13.69                | 381.70        | 166.95       | 37.0            | -19.0  | -19.0 | -30.0  |
|                        |                      |               | 198.90       | 37.0            | -19.0  | -22.0 | -17.0  |
| <b>3</b>               | 13.67                | 493.80        | 152.90       | 37.0            | -24.0  | -21.0 | -25.0  |
|                        |                      |               | 126.90       | 37.0            | -24.0  | -24.0 | -20.0  |
| <b>4</b>               | 14.10                | 493.80        | 166.90       | 37.0            | -24.0  | -22.0 | -29.0  |
|                        |                      |               | 140.95       | 37.0            | -24.0  | -28.0 | -22.0  |
| <b>5</b>               | 13.73                | 397.90        | 167.00       | 37.0            | -30.0  | -18.0 | -29.0  |
|                        |                      |               | 57.90        | 37.0            | -30.0  | -54.0 | -21.0  |
| <b>6</b>               | 12.06                | 367.90        | 153.00       | 37.0            | -29.0  | -14.0 | -26.0  |
|                        |                      |               | 126.95       | 37.0            | -29.0  | -17.0 | -21.0  |
| <b>7</b>               | 12.51                | 367.80        | 167.05       | 37.0            | -26.0  | -18.0 | -30.0  |
|                        |                      |               | 58.00        | 37.0            | -26.0  | -41.0 | -20.0  |
| <b>8</b>               | 10.54                | 183.90        | 141.00       | 37.0            | -21.0  | -13.0 | -24.0  |
|                        |                      |               | 42.85        | 37.0            | -21.0  | -31.0 | -16.0  |
| <b>9</b>               | 3.96                 | 169.90        | 127.00       | 264.0           | -18.0  | -12.0 | -20.0  |
|                        |                      |               | 42.85        | 264.0           | -18.0  | -34.0 | -13.0  |
| <b>10</b>              | 6.78                 | 140.70        | 56.95        | 264.0           | -30.0  | -19.0 | -20.0  |
|                        |                      |               | 41.85        | 264.0           | -30.0  | -25.0 | -13.0  |
| <b>11</b>              | 1.74                 | 127.20        | 42.85        | 264.0           | -13.0  | -16.0 | -15.0  |
|                        |                      |               | 41.95        | 264.0           | -13.0  | -25.0 | -14.0  |
| <b>12<sup>a)</sup></b> | 11.02                | 229.90        | 197.90       | 37.0            | +17.0  | +14.0 | +19.0  |
|                        |                      |               | 135.00       | 37.0            | +17.0  | +22.0 | +23.0  |
| <b>13</b>              | 11.06                | 258.90        | 198.90       | 37.0            | -28.0  | -9.0  | -19.0  |
|                        |                      |               | 76.95        | 37.0            | -28.0  | -38.0 | -29.0  |

a) The MRM performed in negative mode.

**Table S2.** Analytical parameters for determination of compounds **1-13**.

| Compound | Regression equation    | R <sup>2</sup> | LOD<br>[ng/mL] | LOQ<br>[ng/mL] | RSD (%)<br>Intra-day<br>precision<br>25<br>[ng/mL] | RSD (%)<br>Intra-day<br>precision<br>200<br>[ng/mL] | RSD (%)<br>Intra-day<br>precision<br>500<br>[ng/mL] | RSD (%)<br>Inter-day<br>precision<br>25<br>[ng/mL] | RSD (%)<br>Inter-day<br>precision<br>200<br>[ng/mL] | RSD (%)<br>Inter-day<br>precision<br>500<br>[ng/mL] | Recovery<br>[%]<br>50<br>[ng/mL] | Recovery<br>[%]<br>300<br>[ng/mL] |
|----------|------------------------|----------------|----------------|----------------|----------------------------------------------------|-----------------------------------------------------|-----------------------------------------------------|----------------------------------------------------|-----------------------------------------------------|-----------------------------------------------------|----------------------------------|-----------------------------------|
| 1        | $y = 994913x + 5304.8$ | 0.9991         | 1.5            | 5.0            | 3.7                                                | 2.8                                                 | 3.4                                                 | 2.2                                                | 3.0                                                 | 2.6                                                 | 99 ± 5                           | 101 ± 3                           |
| 2        | $y = 501575x + 4875.9$ | 0.9997         | 3.0            | 10.0           | 4.2                                                | 5.2                                                 | 4.1                                                 | 2.1                                                | 4.4                                                 | 3.2                                                 | 105 ± 1                          | 103 ± 1                           |
| 3        | $y = 575947x + 1201.2$ | 0.9997         | 3.0            | 10.0           | 4.0                                                | 3.3                                                 | 3.2                                                 | 4.2                                                | 2.0                                                 | 3.1                                                 | 94 ± 4                           | 105 ± 3                           |
| 4        | $y = 502142x + 1677.8$ | 0.9992         | 1.5            | 5.0            | 4.1                                                | 2.5                                                 | 4.4                                                 | 5.2                                                | 4.1                                                 | 4.6                                                 | 83 ± 5                           | 91 ± 2                            |
| 5        | $y = 549107x + 3335.7$ | 0.9993         | 1.5            | 5.0            | 2.5                                                | 1.2                                                 | 3.6                                                 | 2.8                                                | 2.9                                                 | 2.9                                                 | 93 ± 4                           | 101 ± 5                           |
| 6        | $y = 292160x + 1085.7$ | 0.9989         | 3.0            | 10.0           | 5.5                                                | 1.6                                                 | 2.1                                                 | 4.0                                                | 4.0                                                 | 3.0                                                 | 99 ± 2                           | 102 ± 5                           |
| 7        | $y = 343333x + 1311$   | 0.9993         | 1.5            | 5.0            | 4.2                                                | 2.4                                                 | 2.6                                                 | 4.5                                                | 1.8                                                 | 4.1                                                 | 92 ± 3                           | 79 ± 5                            |
| 8        | $y = 845574x + 4800.4$ | 0.9990         | 3.0            | 10.0           | 3.9                                                | 1.1                                                 | 2.5                                                 | 4.1                                                | 1.9                                                 | 3.0                                                 | 102 ± 4                          | 103 ± 4                           |
| 9        | $y = 269056x - 406.02$ | 0.9999         | 3.0            | 10.0           | 4.1                                                | 3.9                                                 | 3.9                                                 | 3.2                                                | 3.4                                                 | 4.8                                                 | 101 ± 3                          | 105 ± 1                           |
| 10       | $y = 160621x + 843.99$ | 0.9997         | 7.5            | 25.0           | 2.2                                                | 2.9                                                 | 2.6                                                 | 4.9                                                | 3.9                                                 | 2.8                                                 | 104 ± 3                          | 105 ± 2                           |
| 11       | $y = 94693x + 76.7$    | 0.9996         | 60.0           | 200.0          | nd.                                                | 4.0                                                 | 4.9                                                 | nd.                                                | 4.8                                                 | 5.0                                                 | 102 ± 5                          | 104 ± 4                           |
| 12       | $y = 256865x + 5107.5$ | 0.9989         | 3.0            | 10.0           | 1.2                                                | 4.8                                                 | 2.6                                                 | 4.5                                                | 4.5                                                 | 4.5                                                 | 105 ± 4                          | 102 ± 4                           |
| 13       | $y = 637448x + 2656.2$ | 0.9990         | 1.5            | 5.0            | 4.6                                                | 2.2                                                 | 2.2                                                 | 4.1                                                | 3.3                                                 | 3.7                                                 | 98 ± 4                           | 80 ± 5                            |

# $^1\text{H}$ NMR and $^{13}\text{C}$ NMR spectra

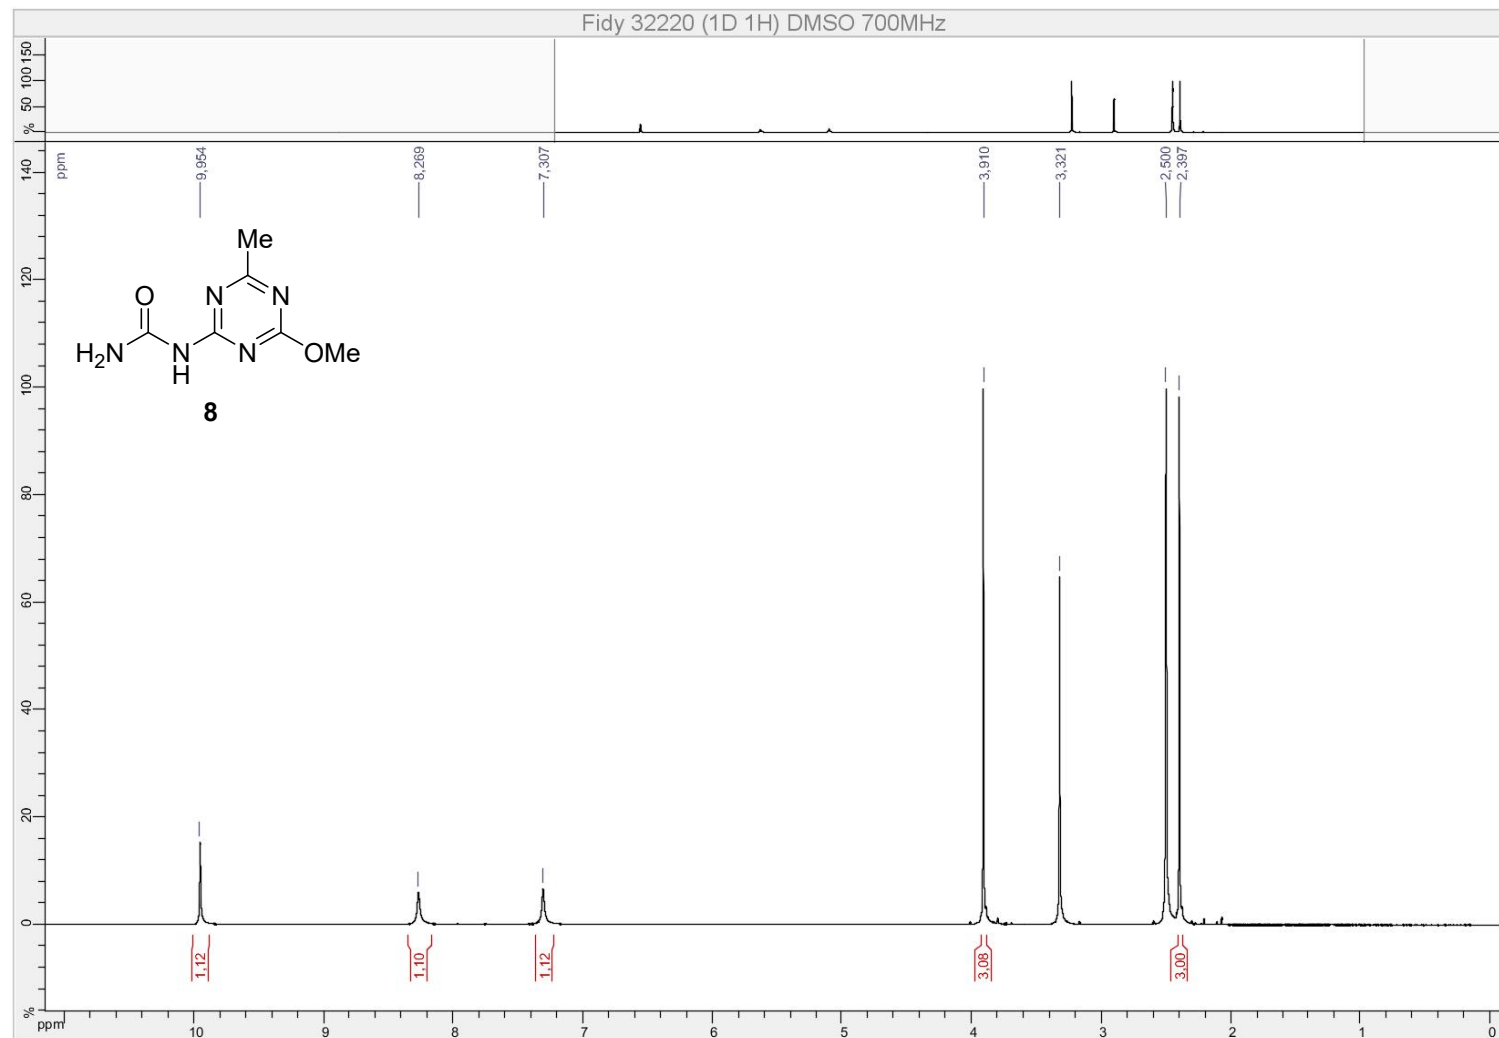

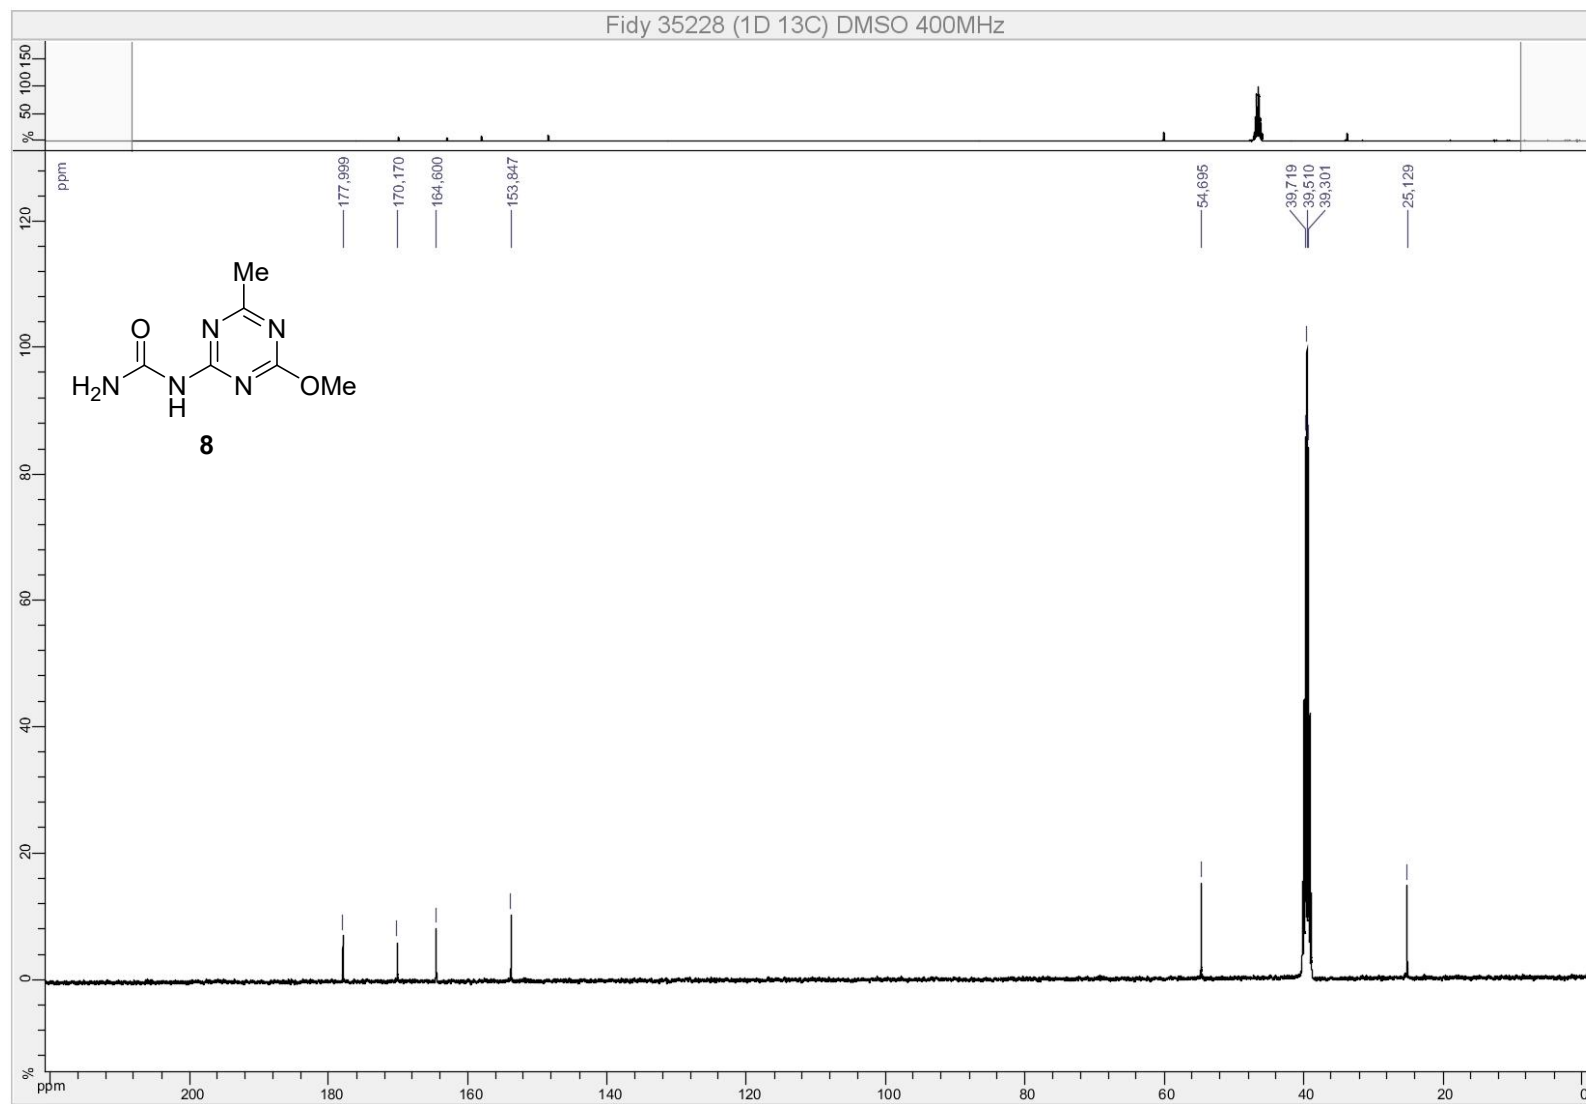

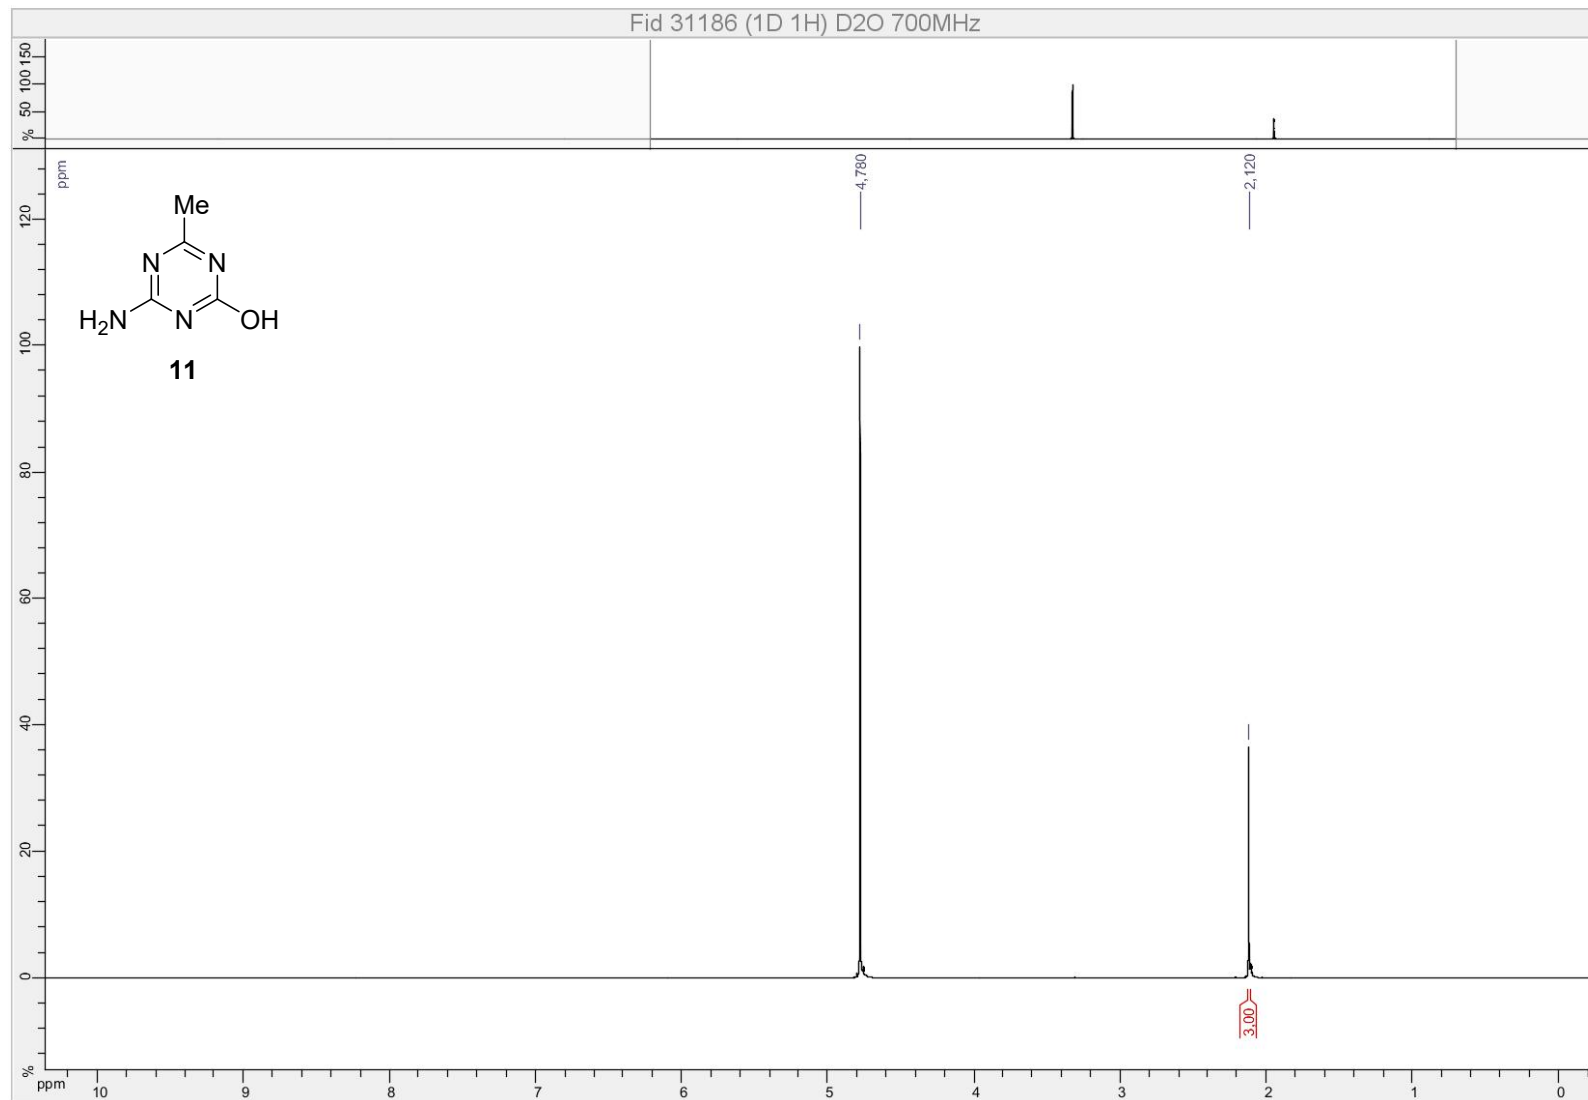



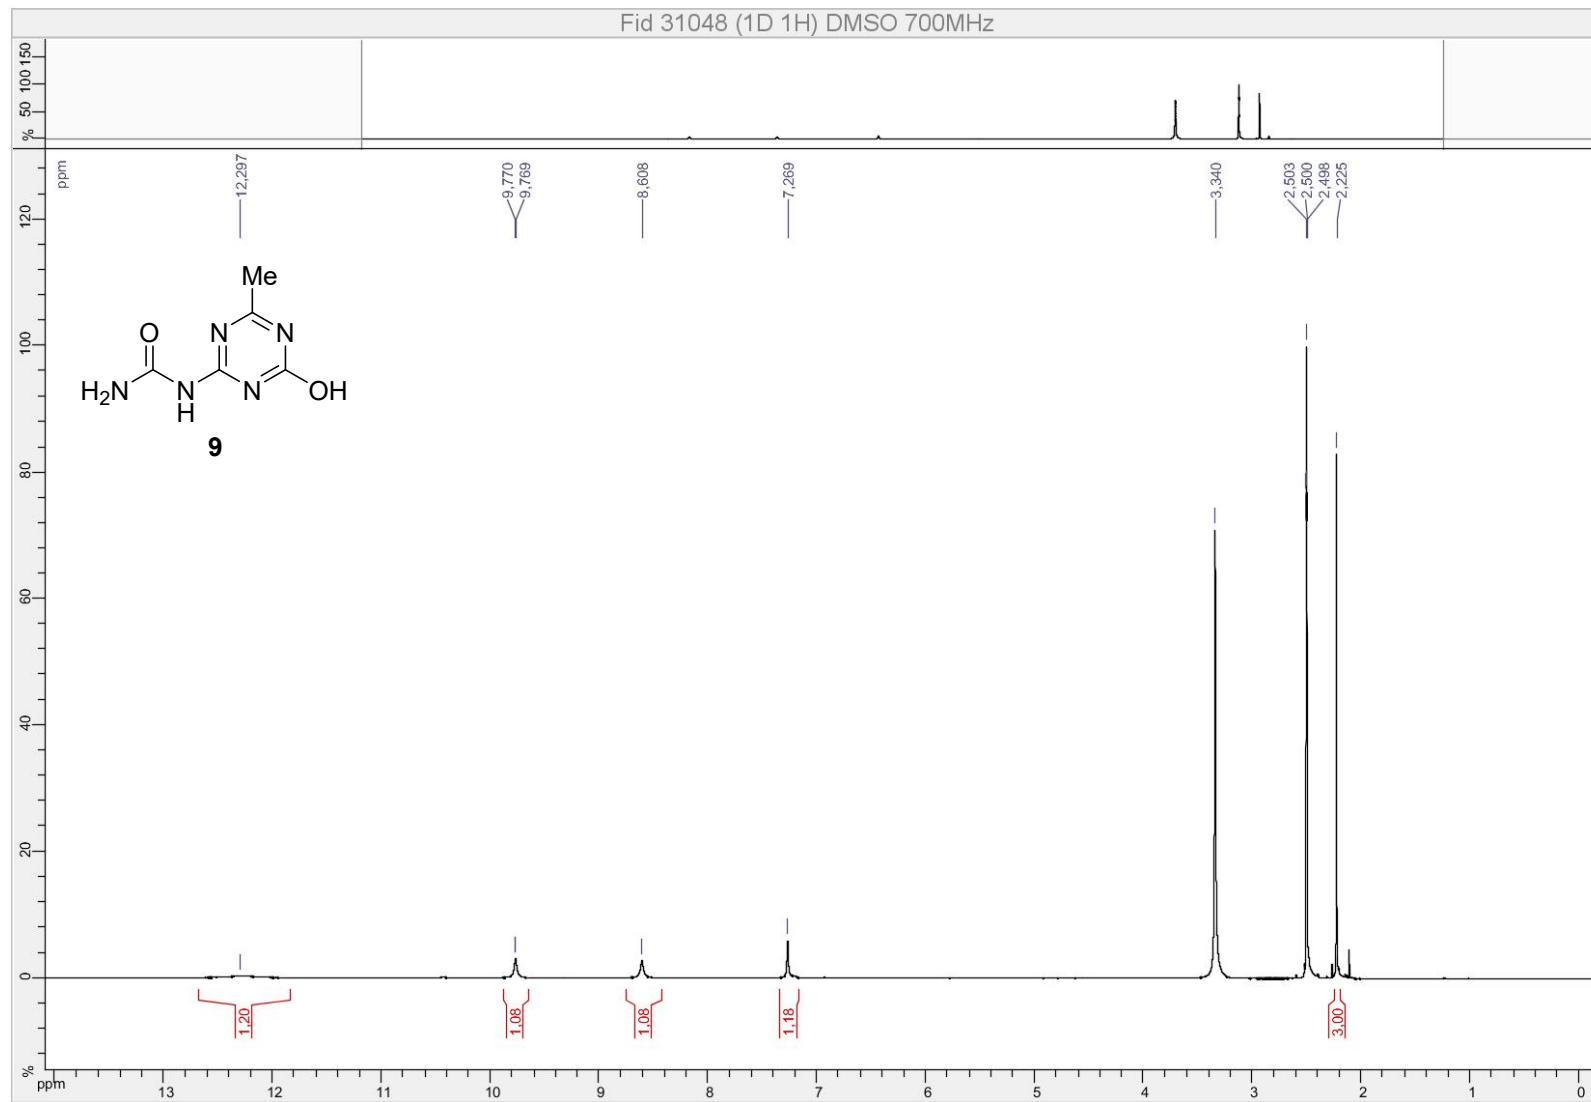

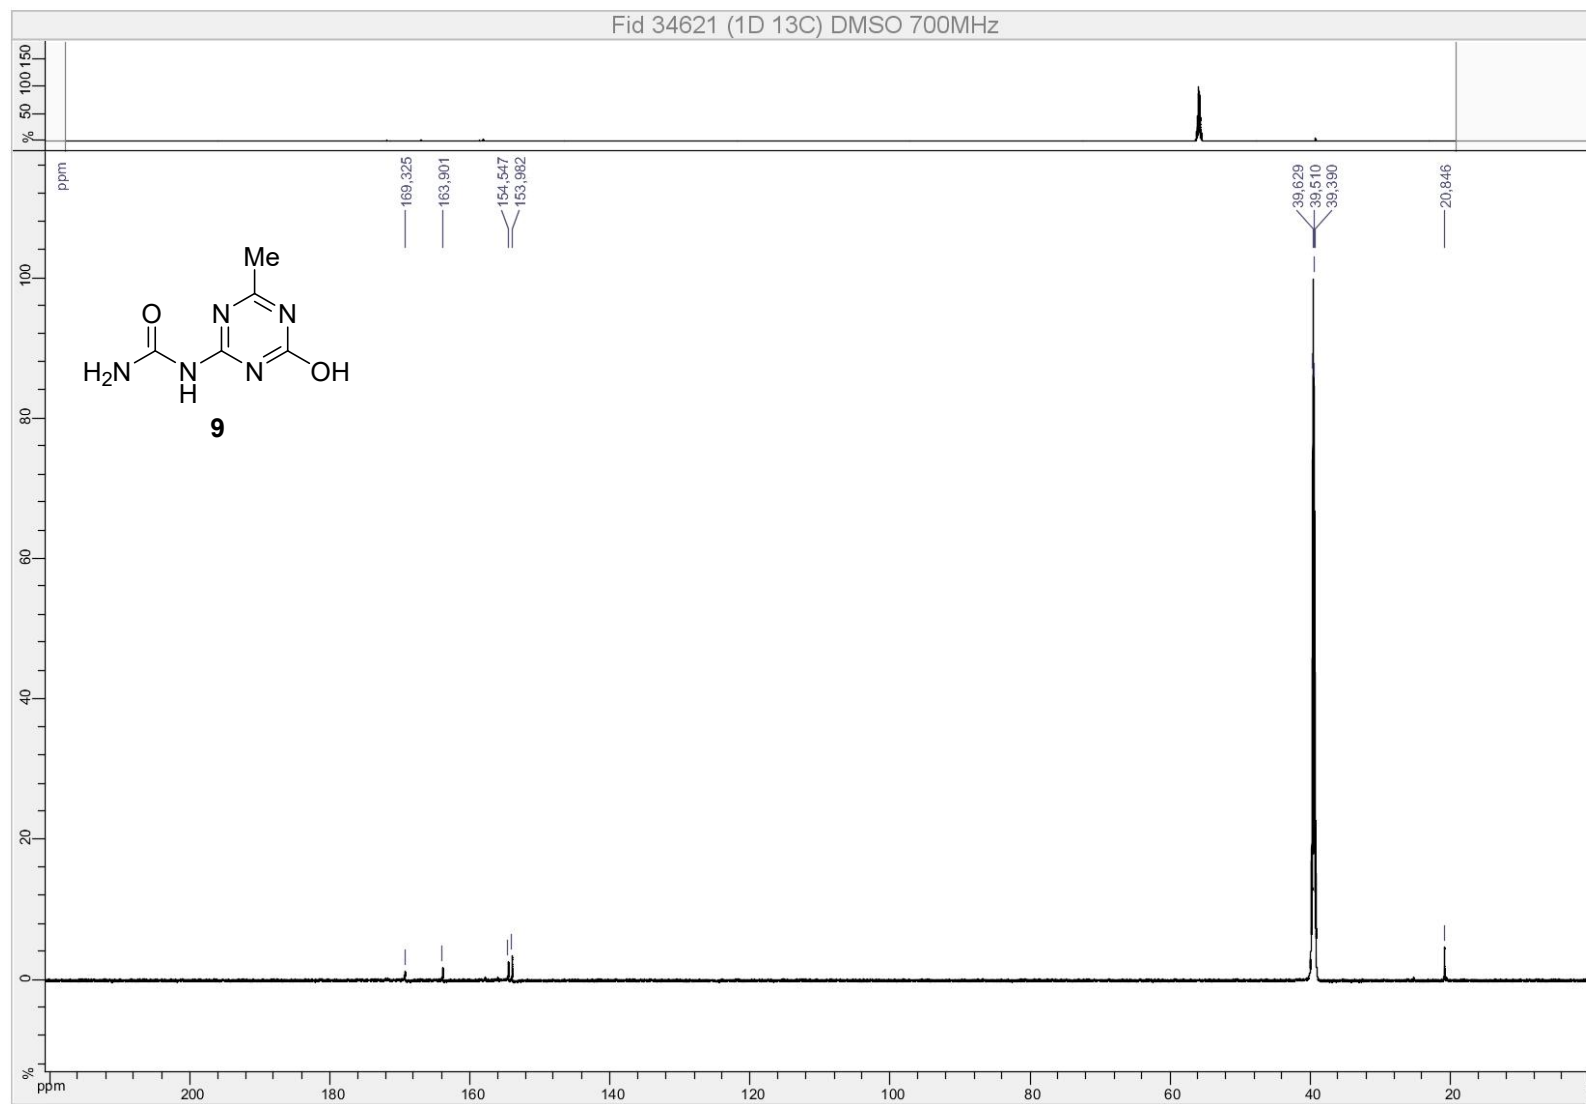

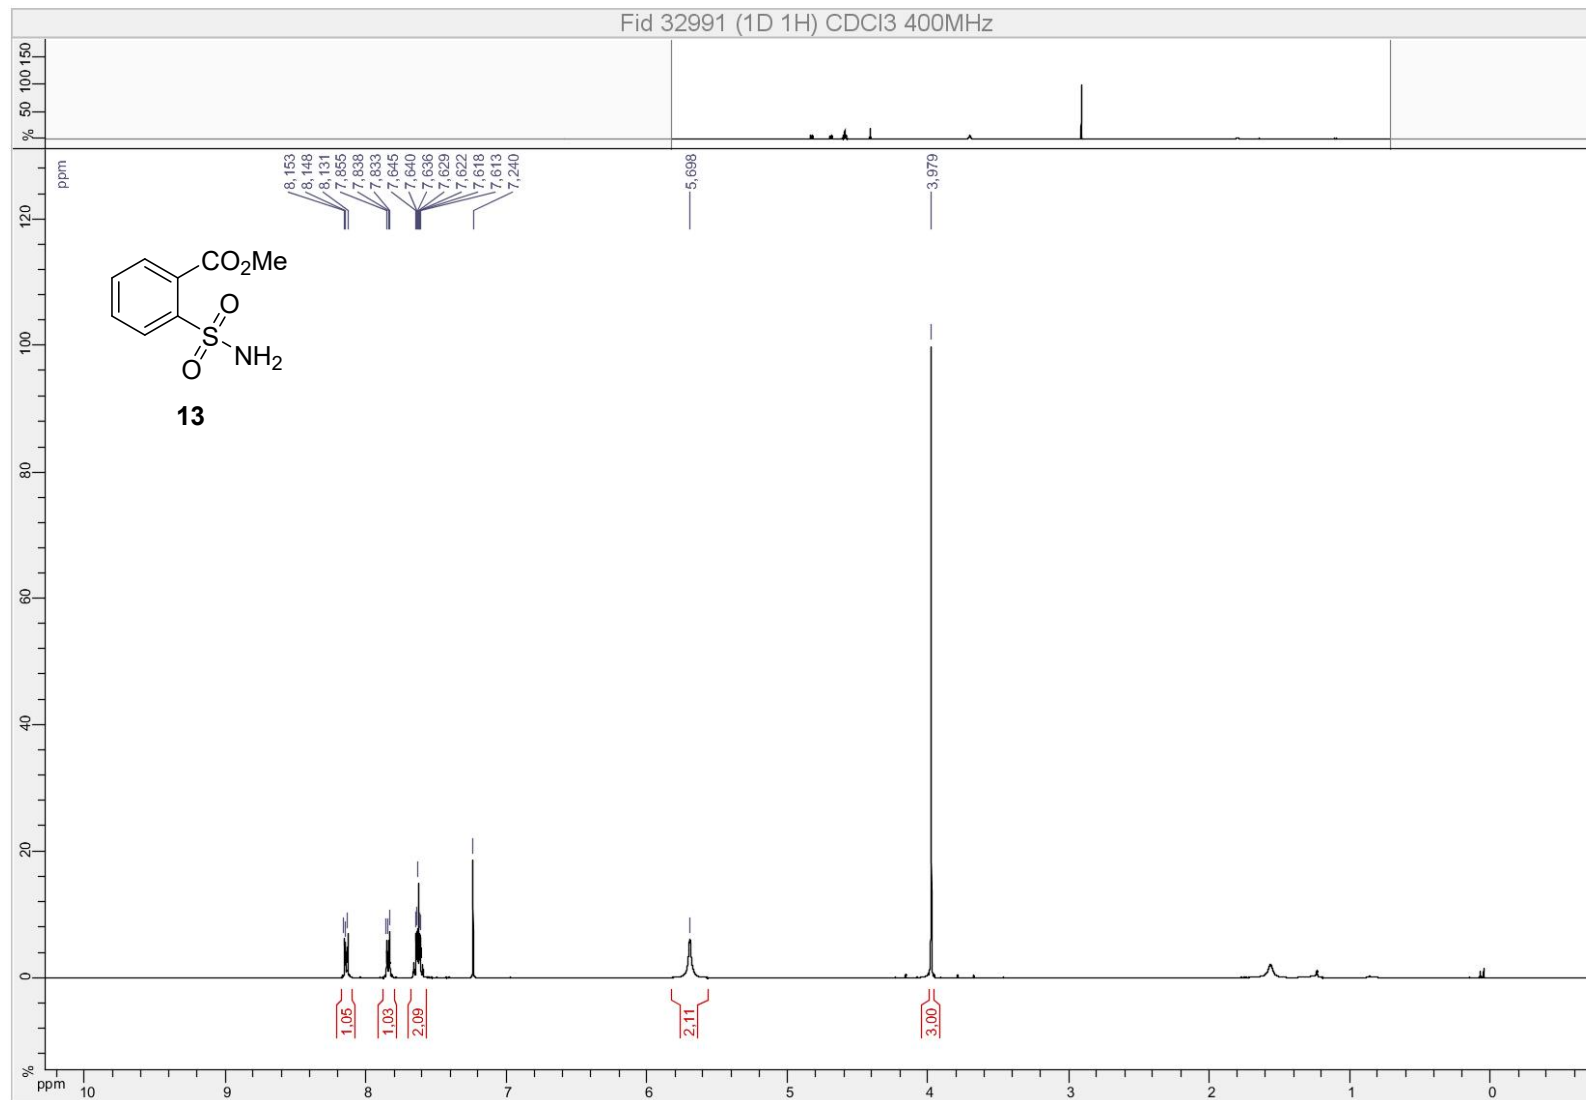

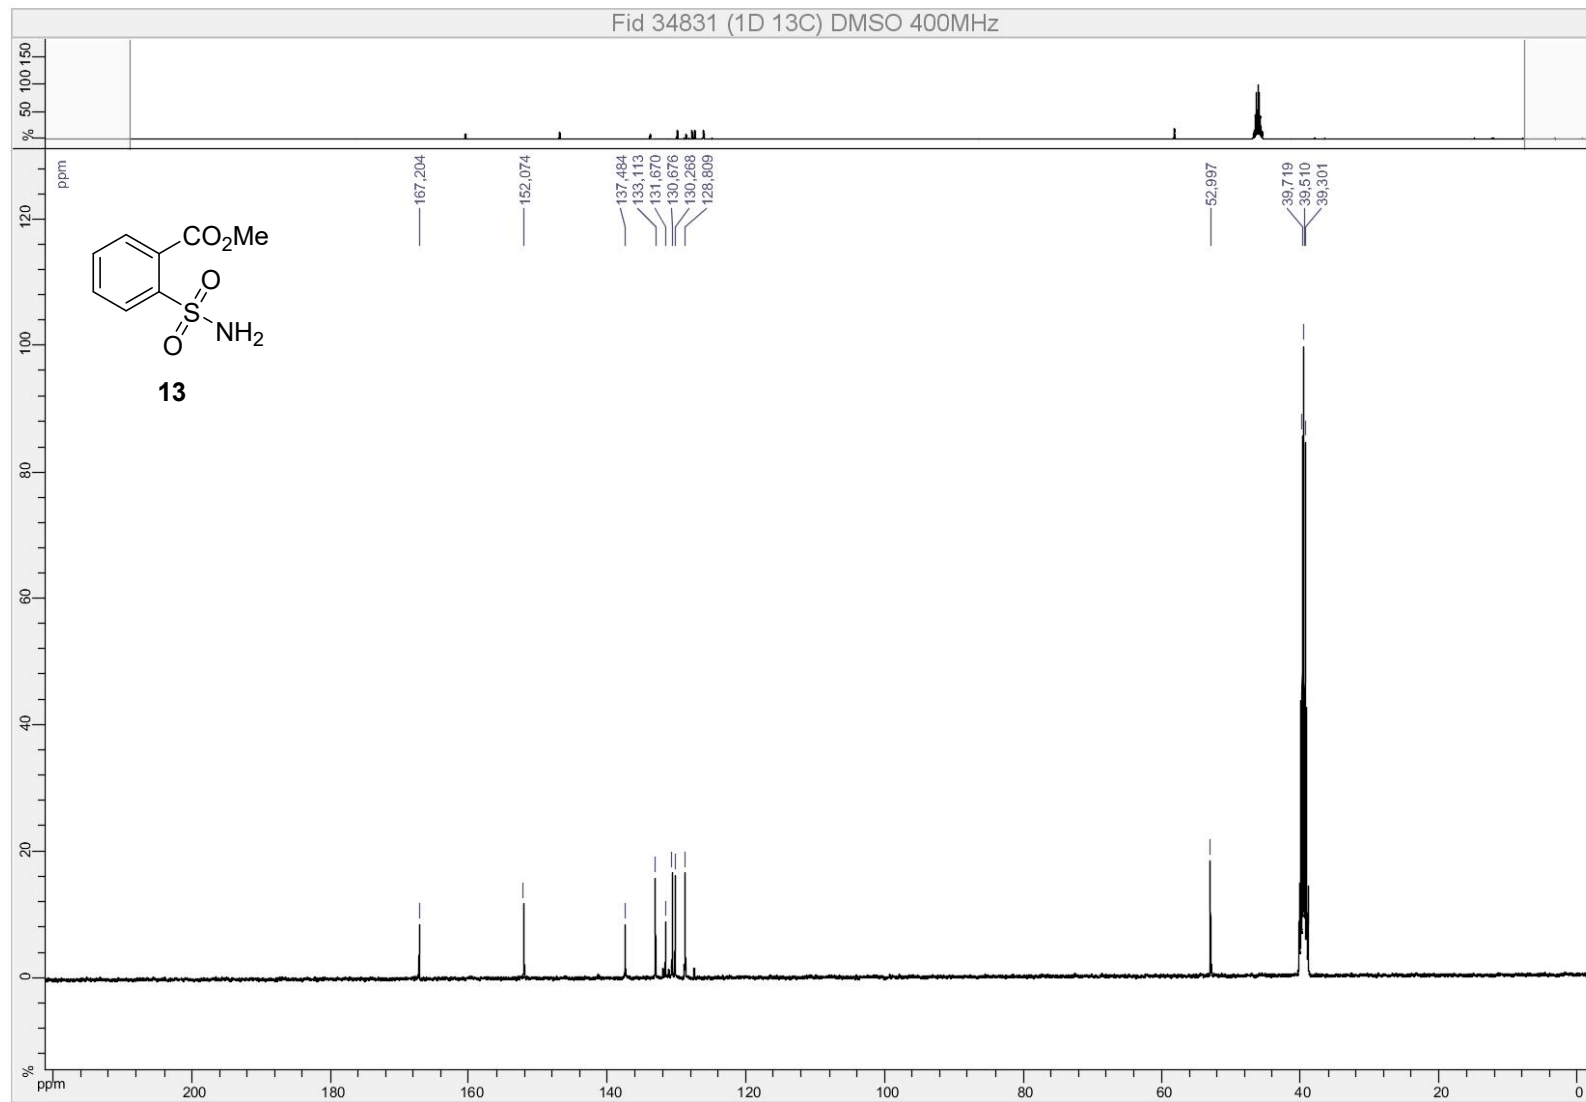

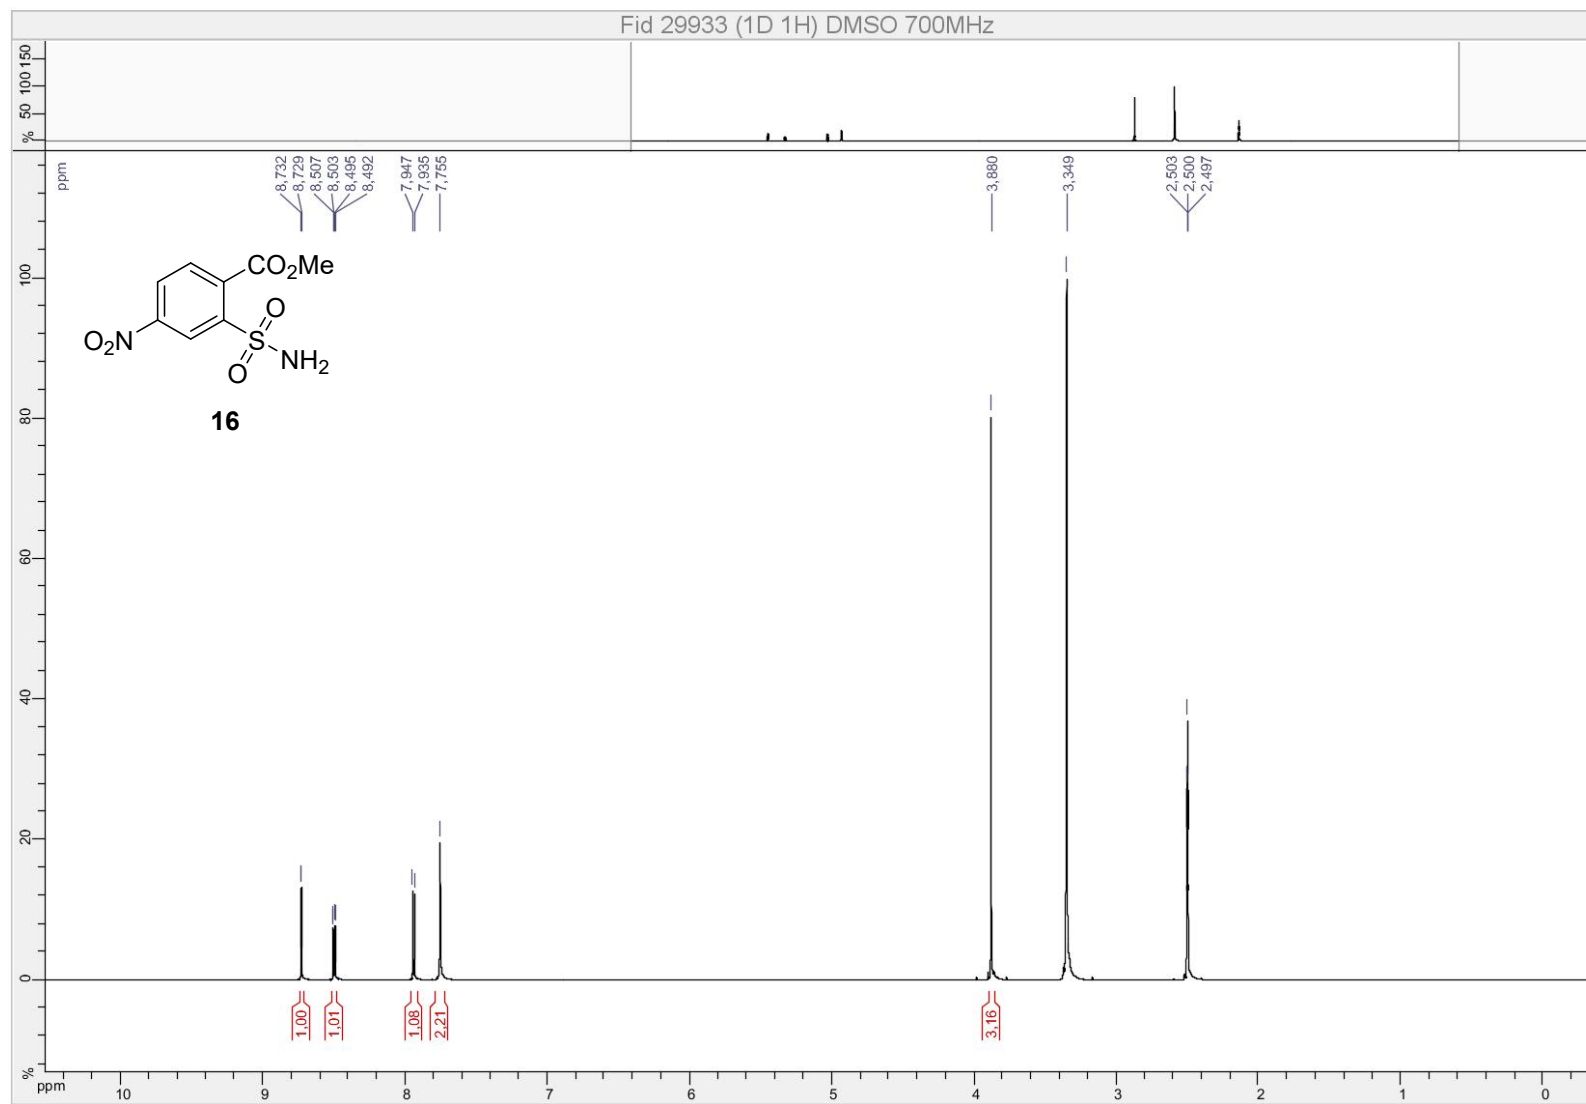

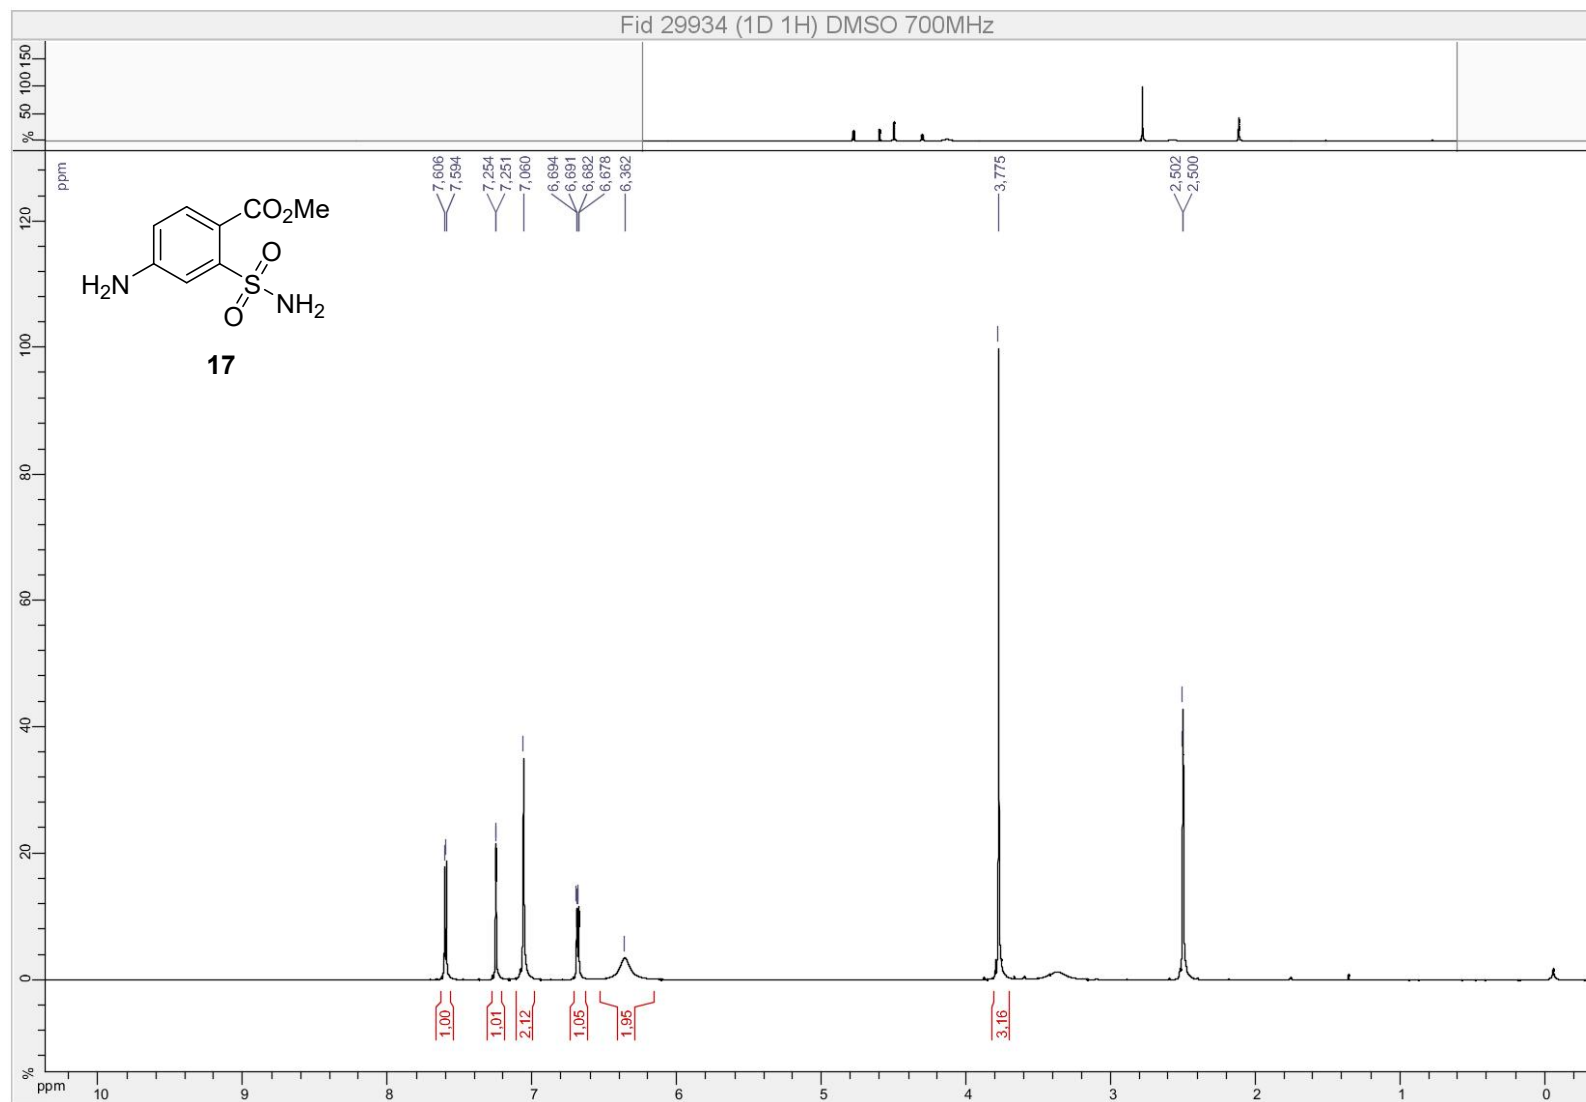

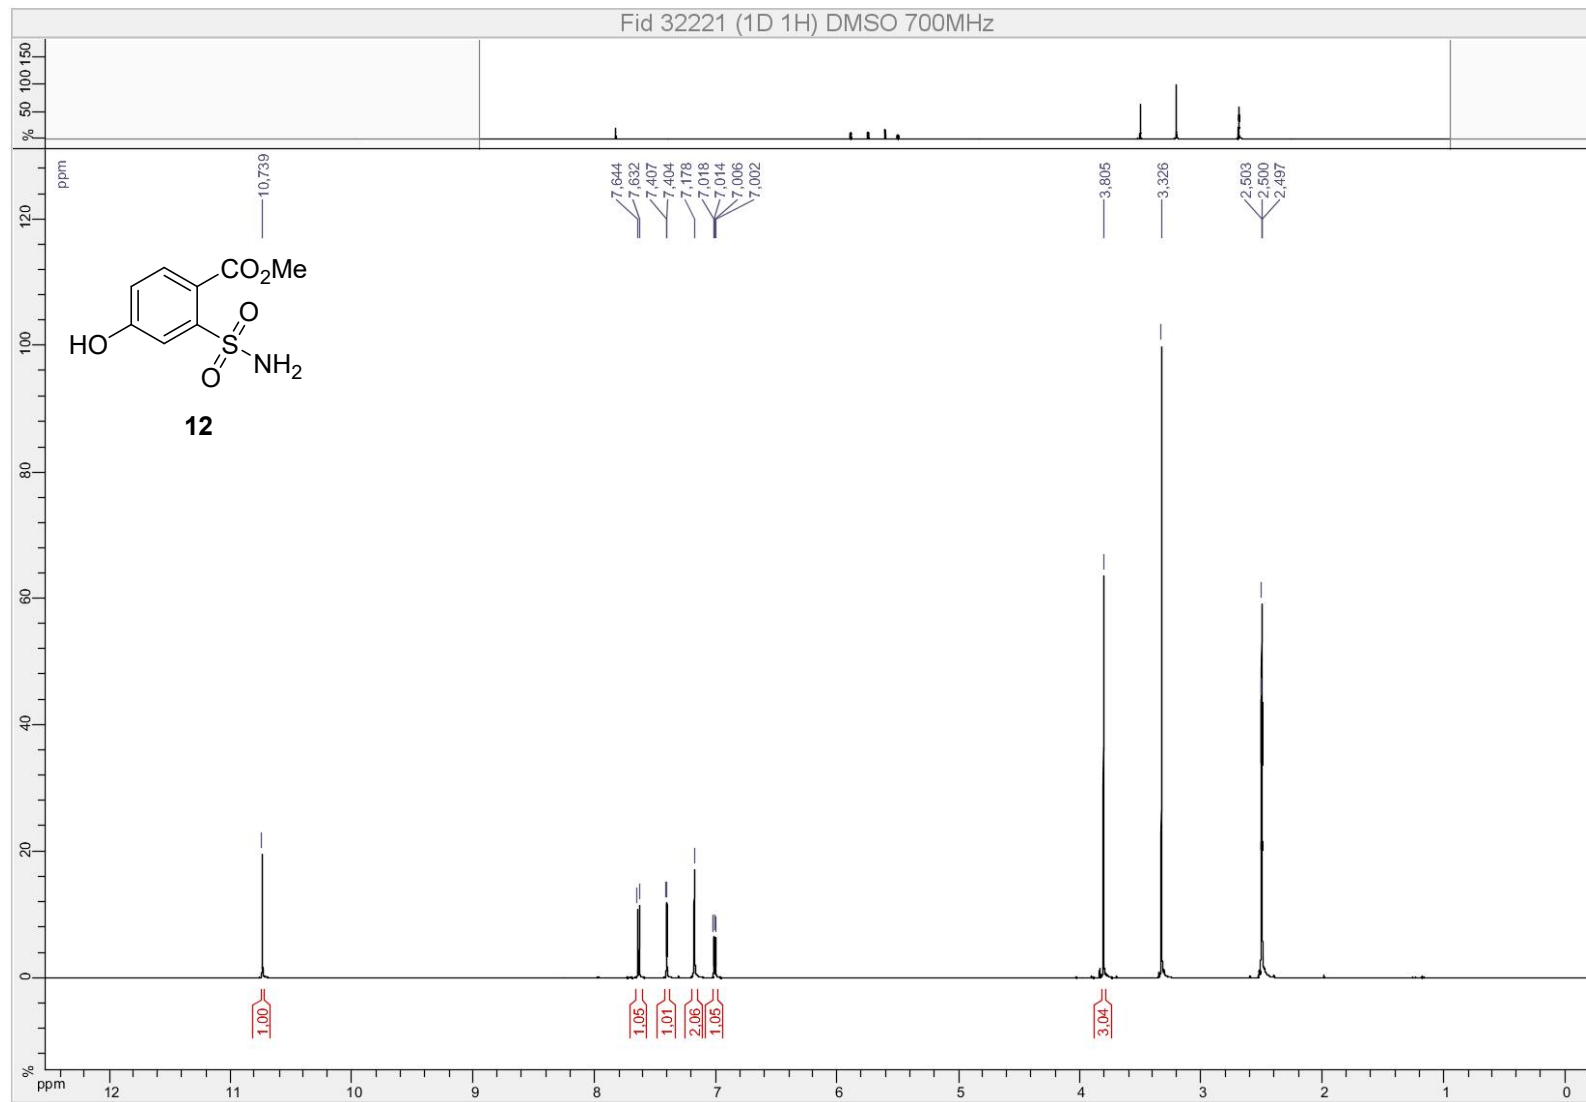

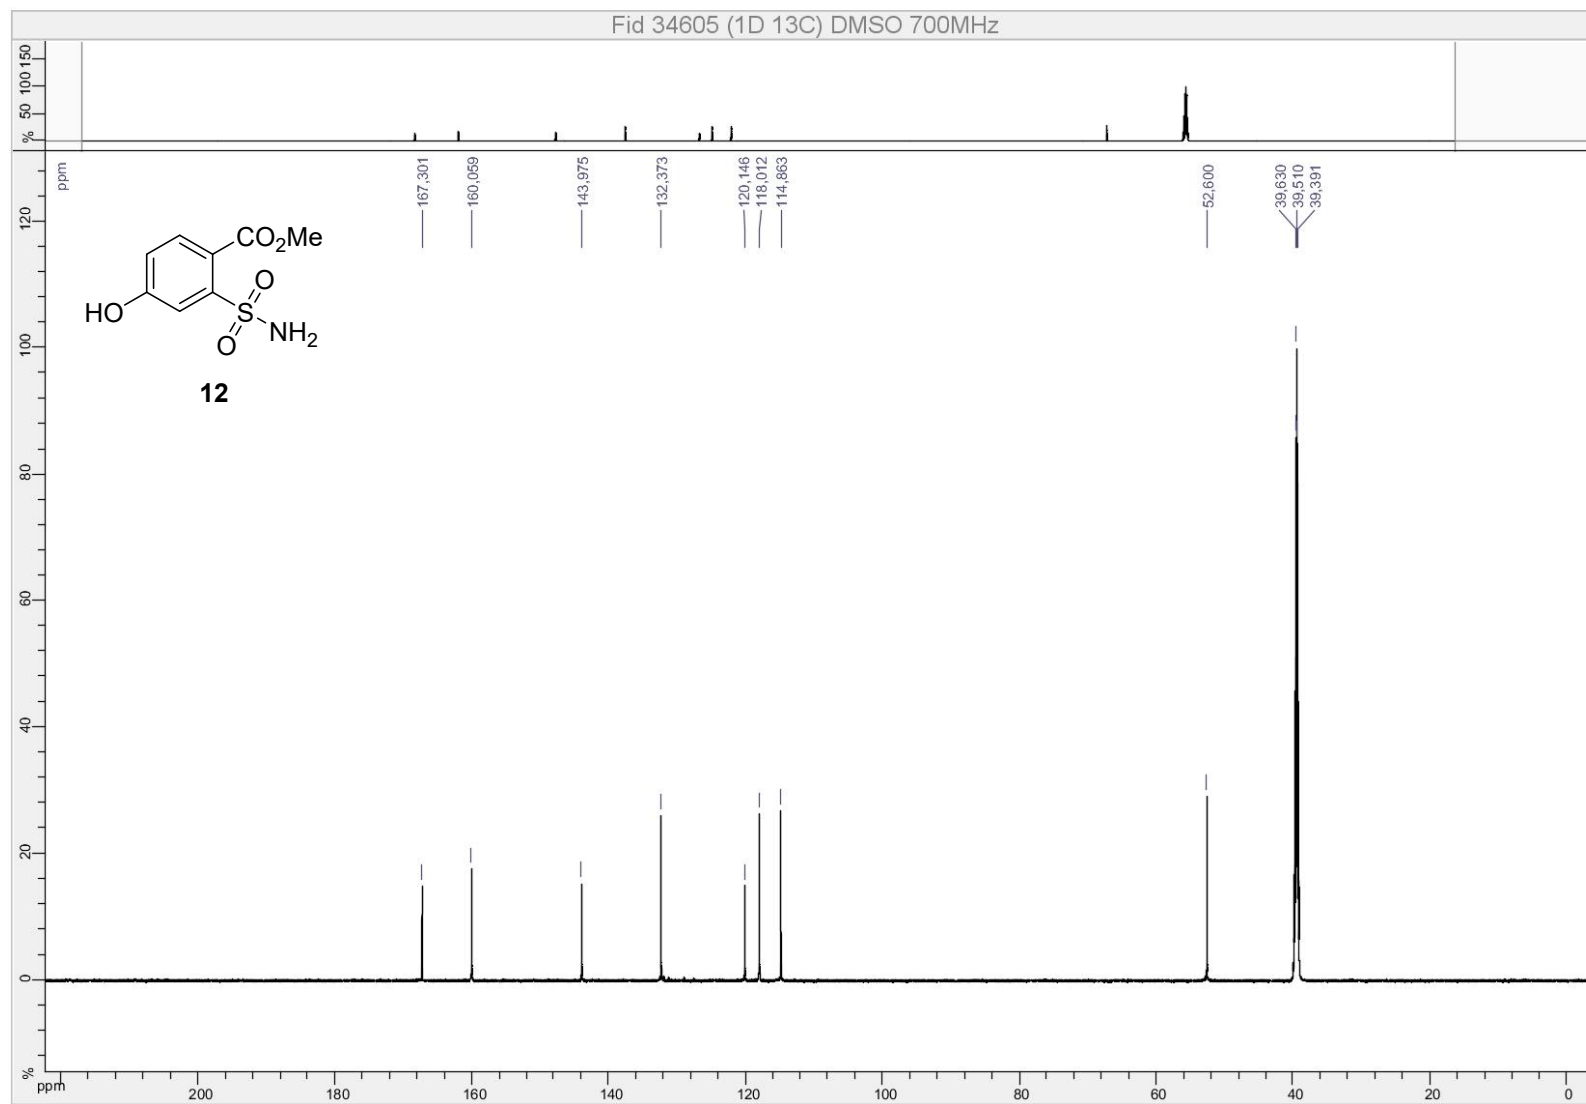



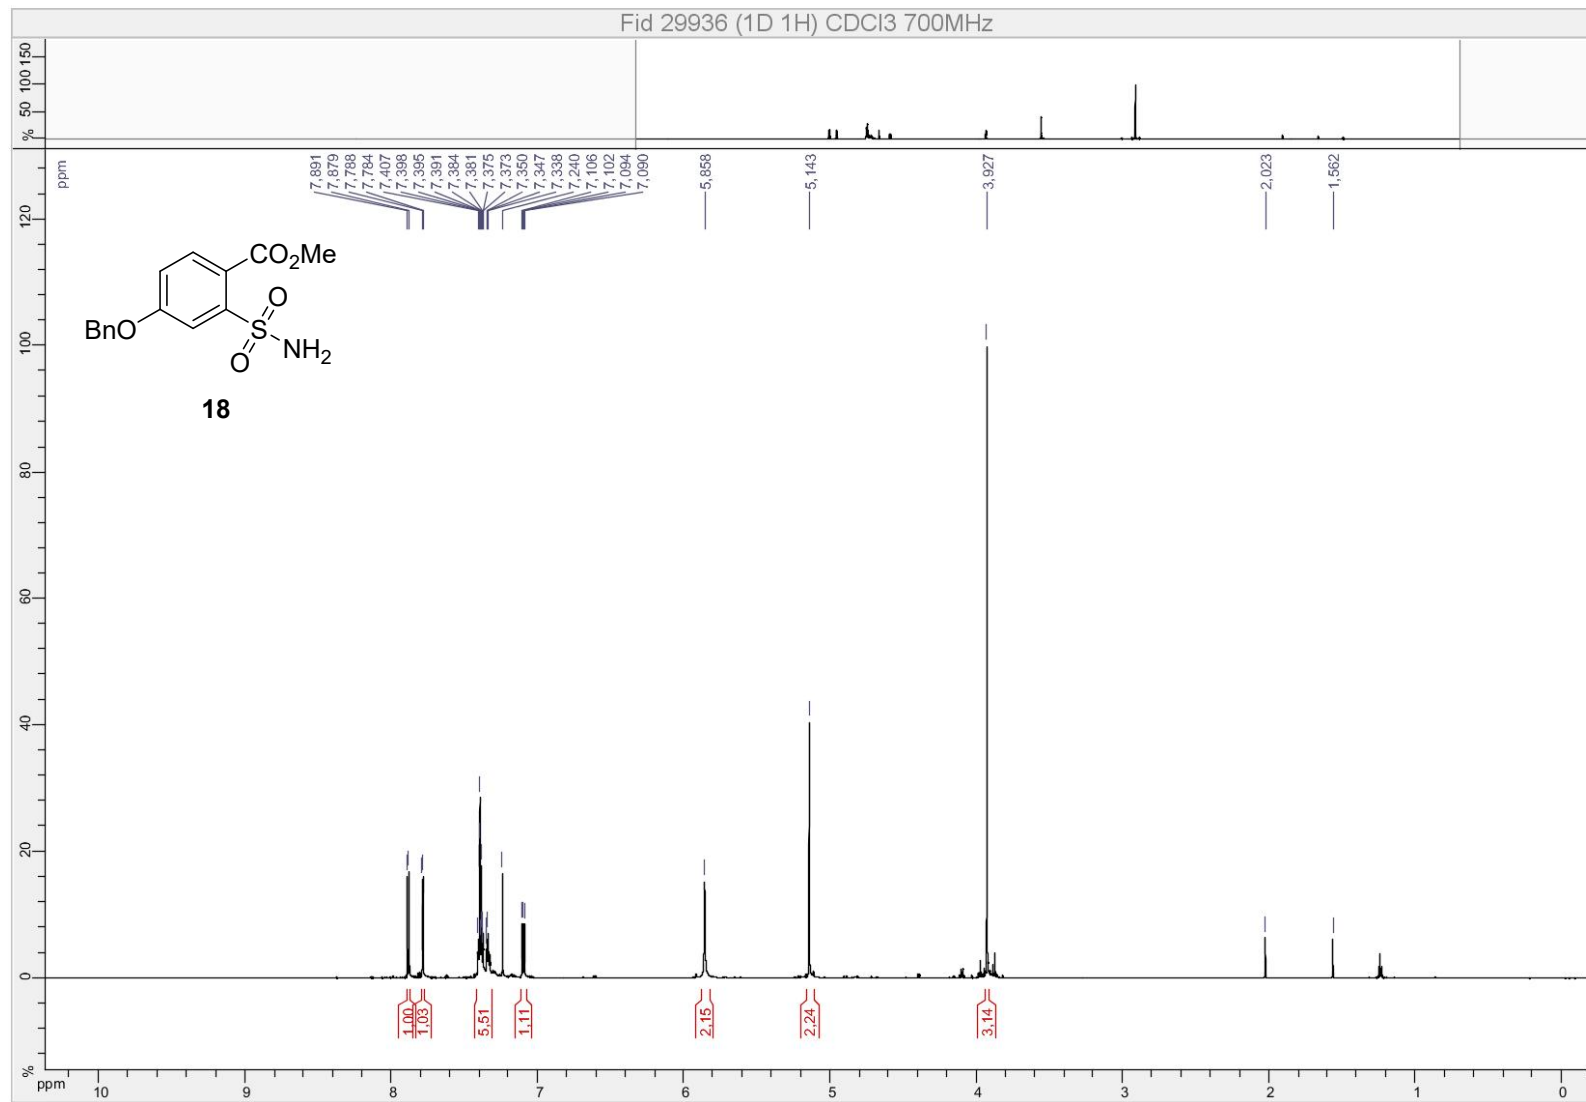

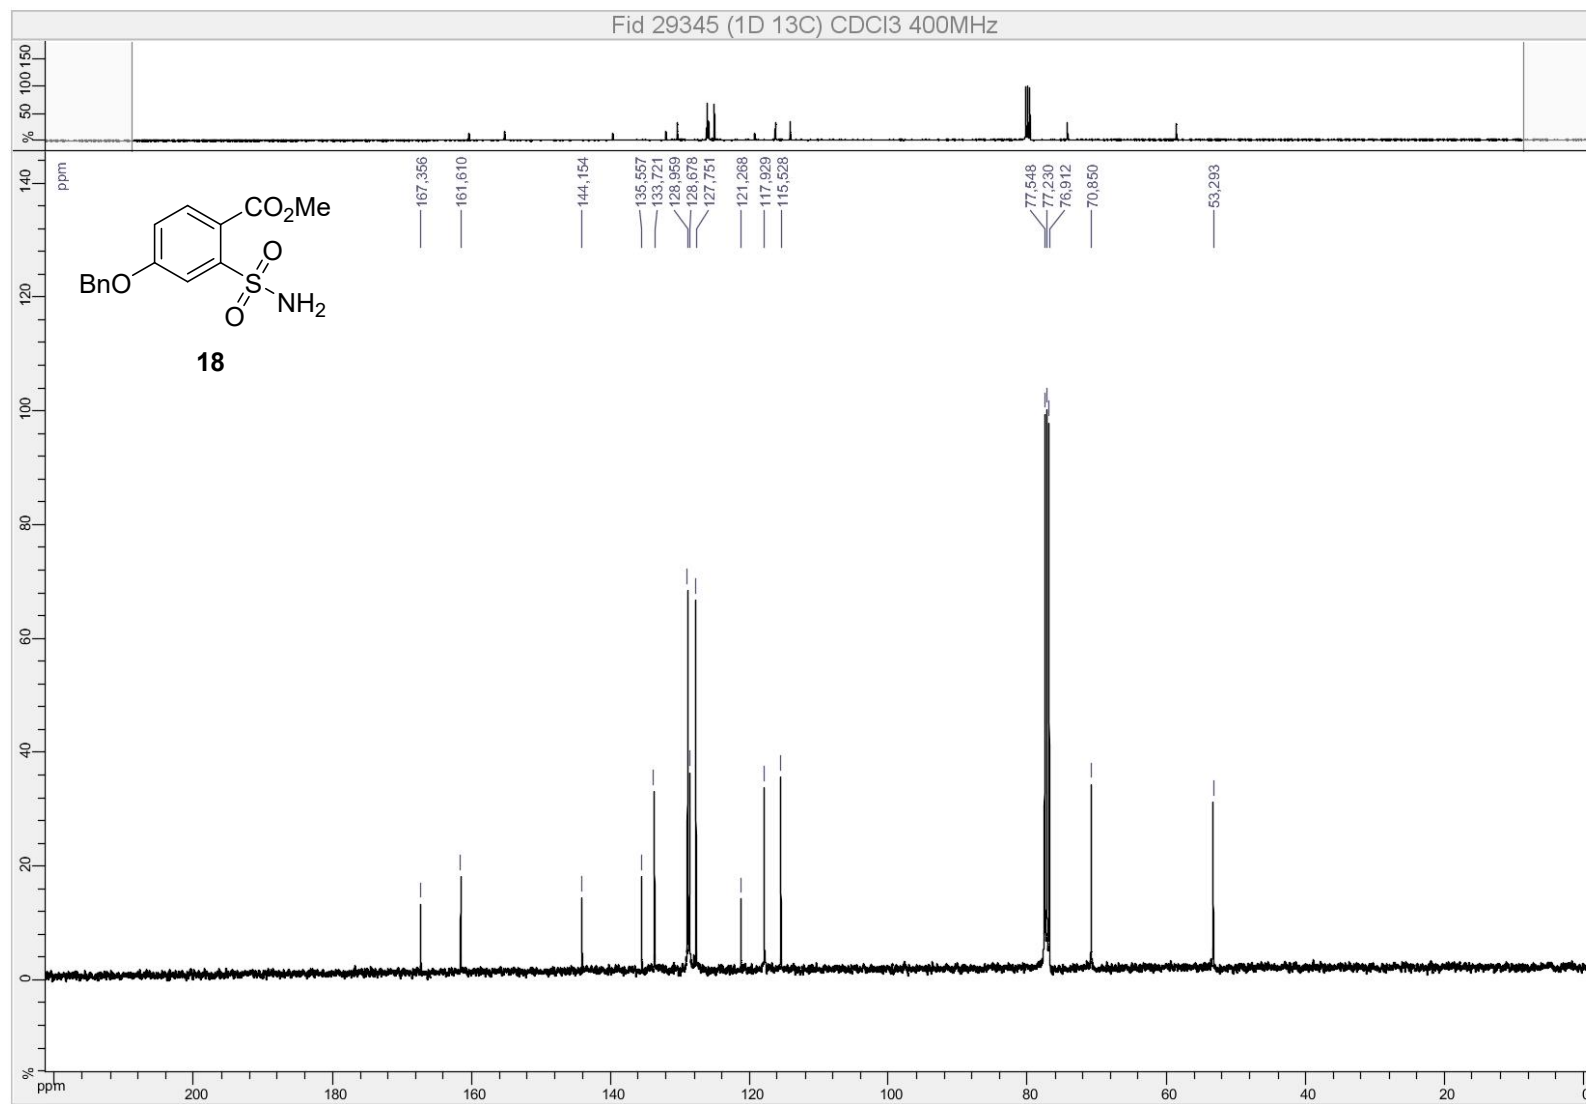

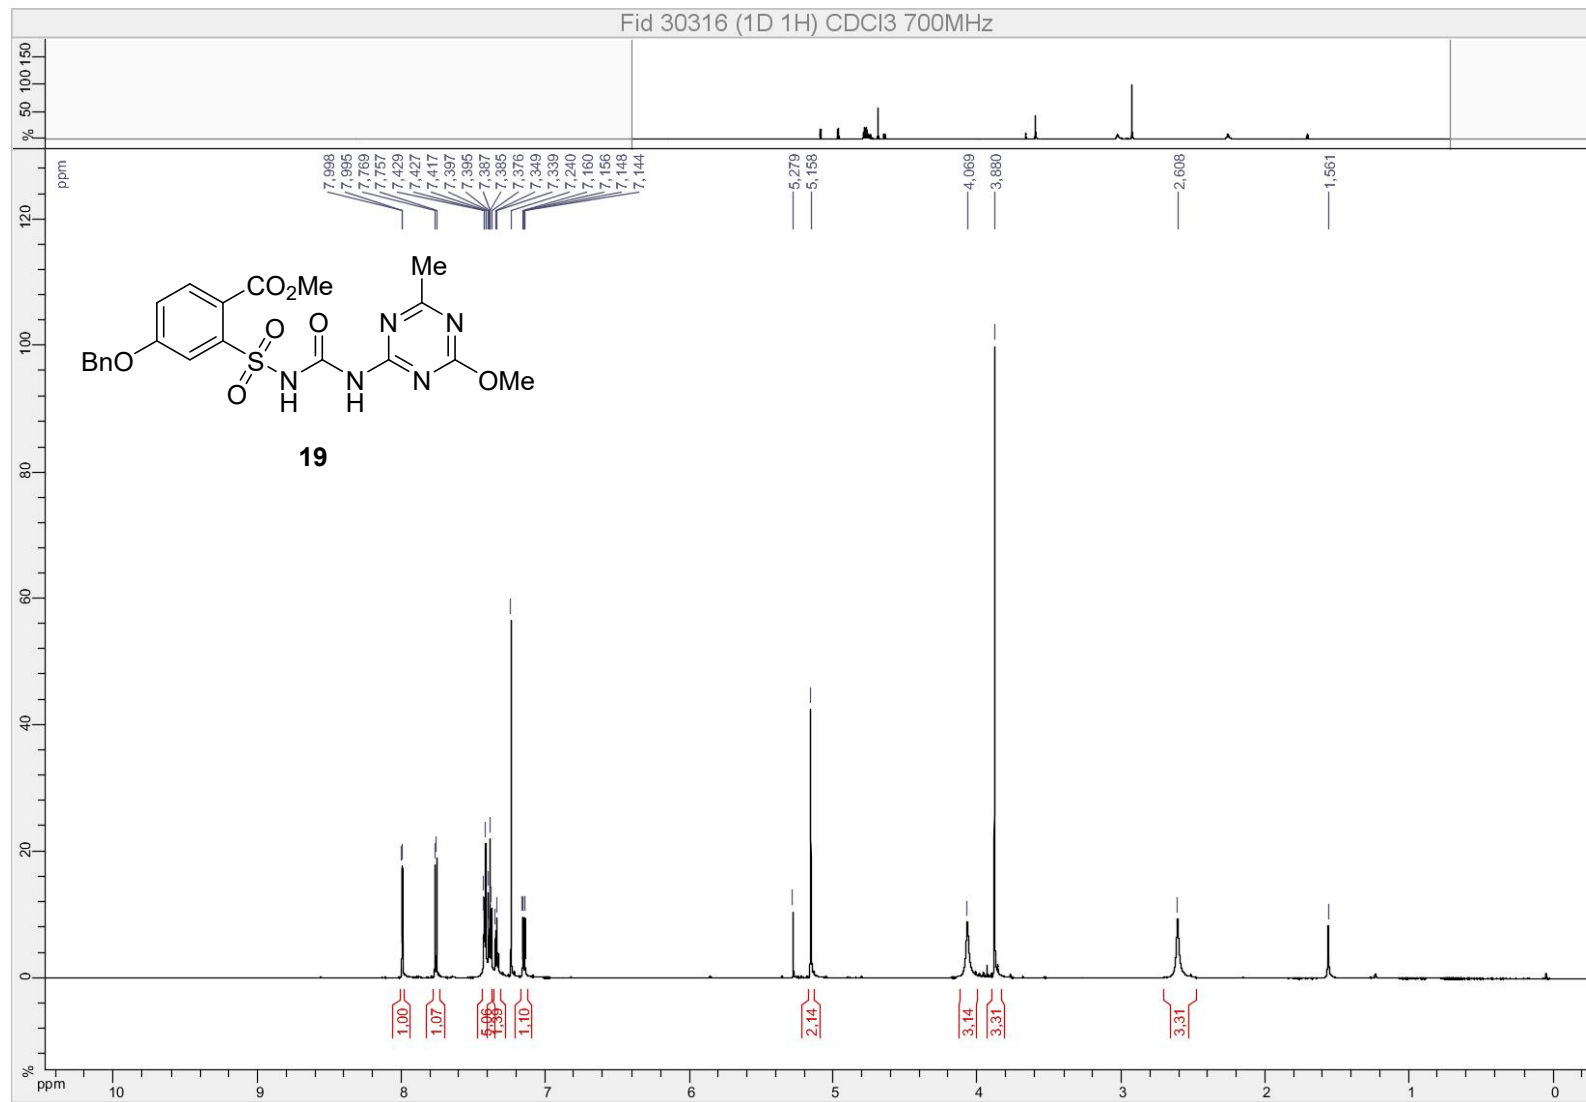

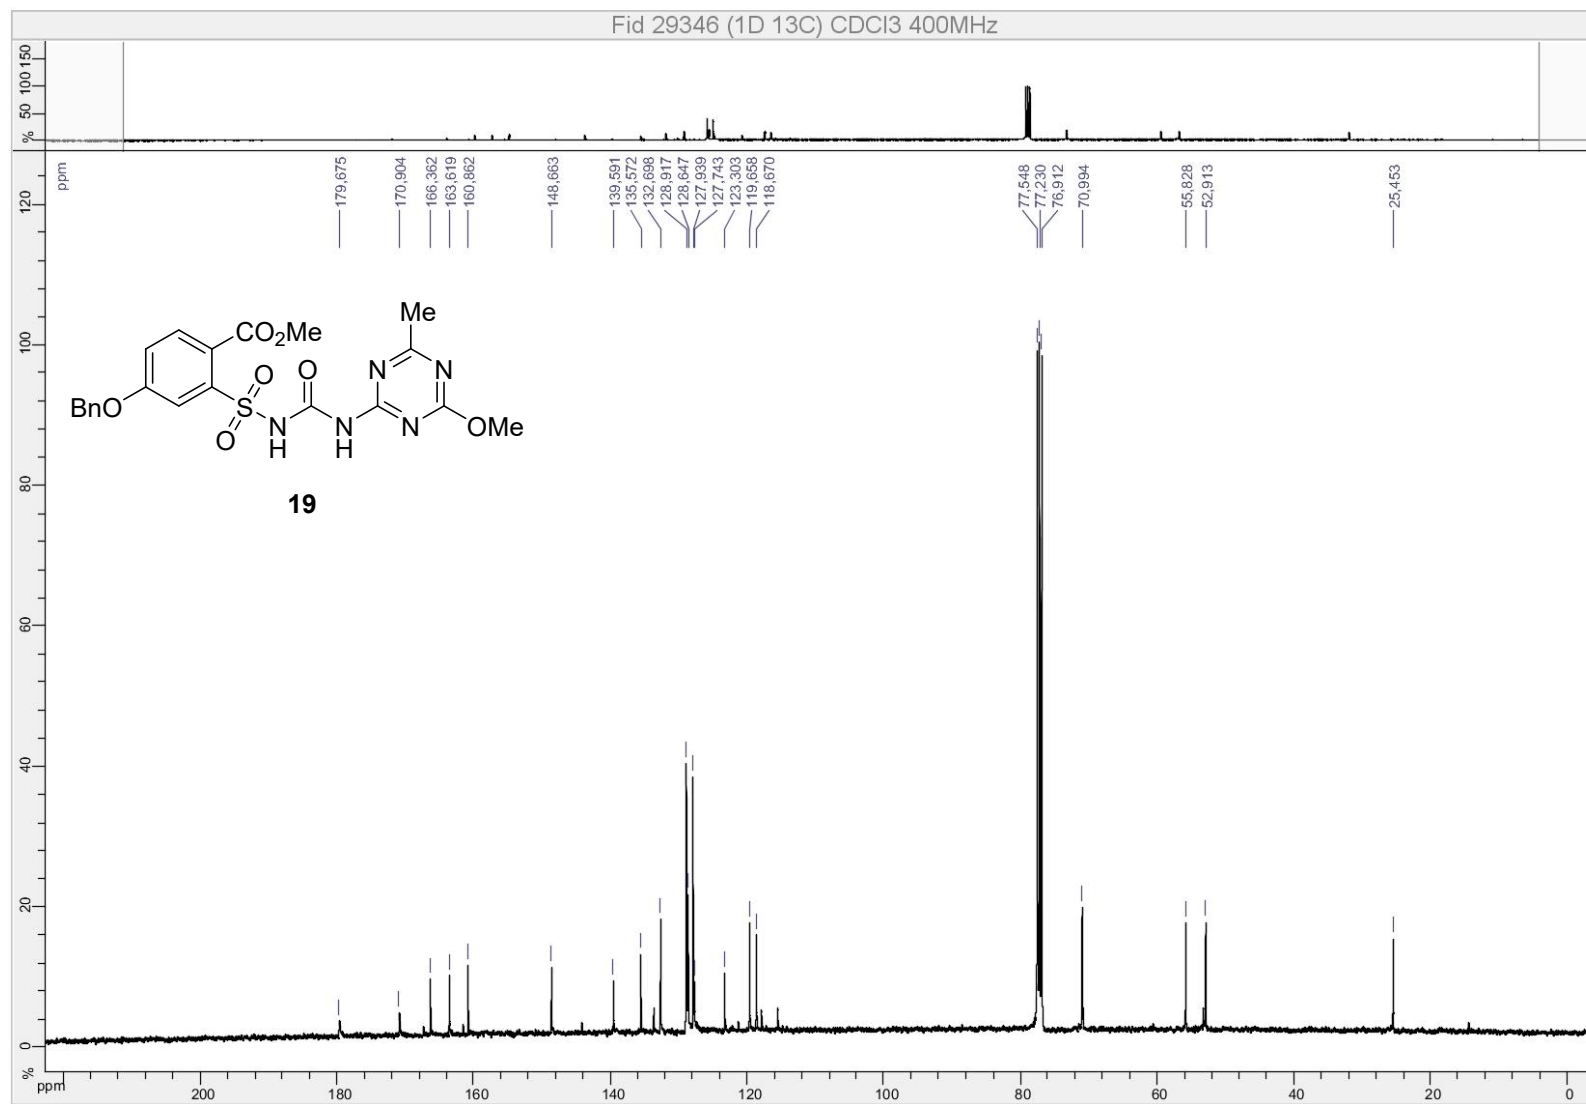

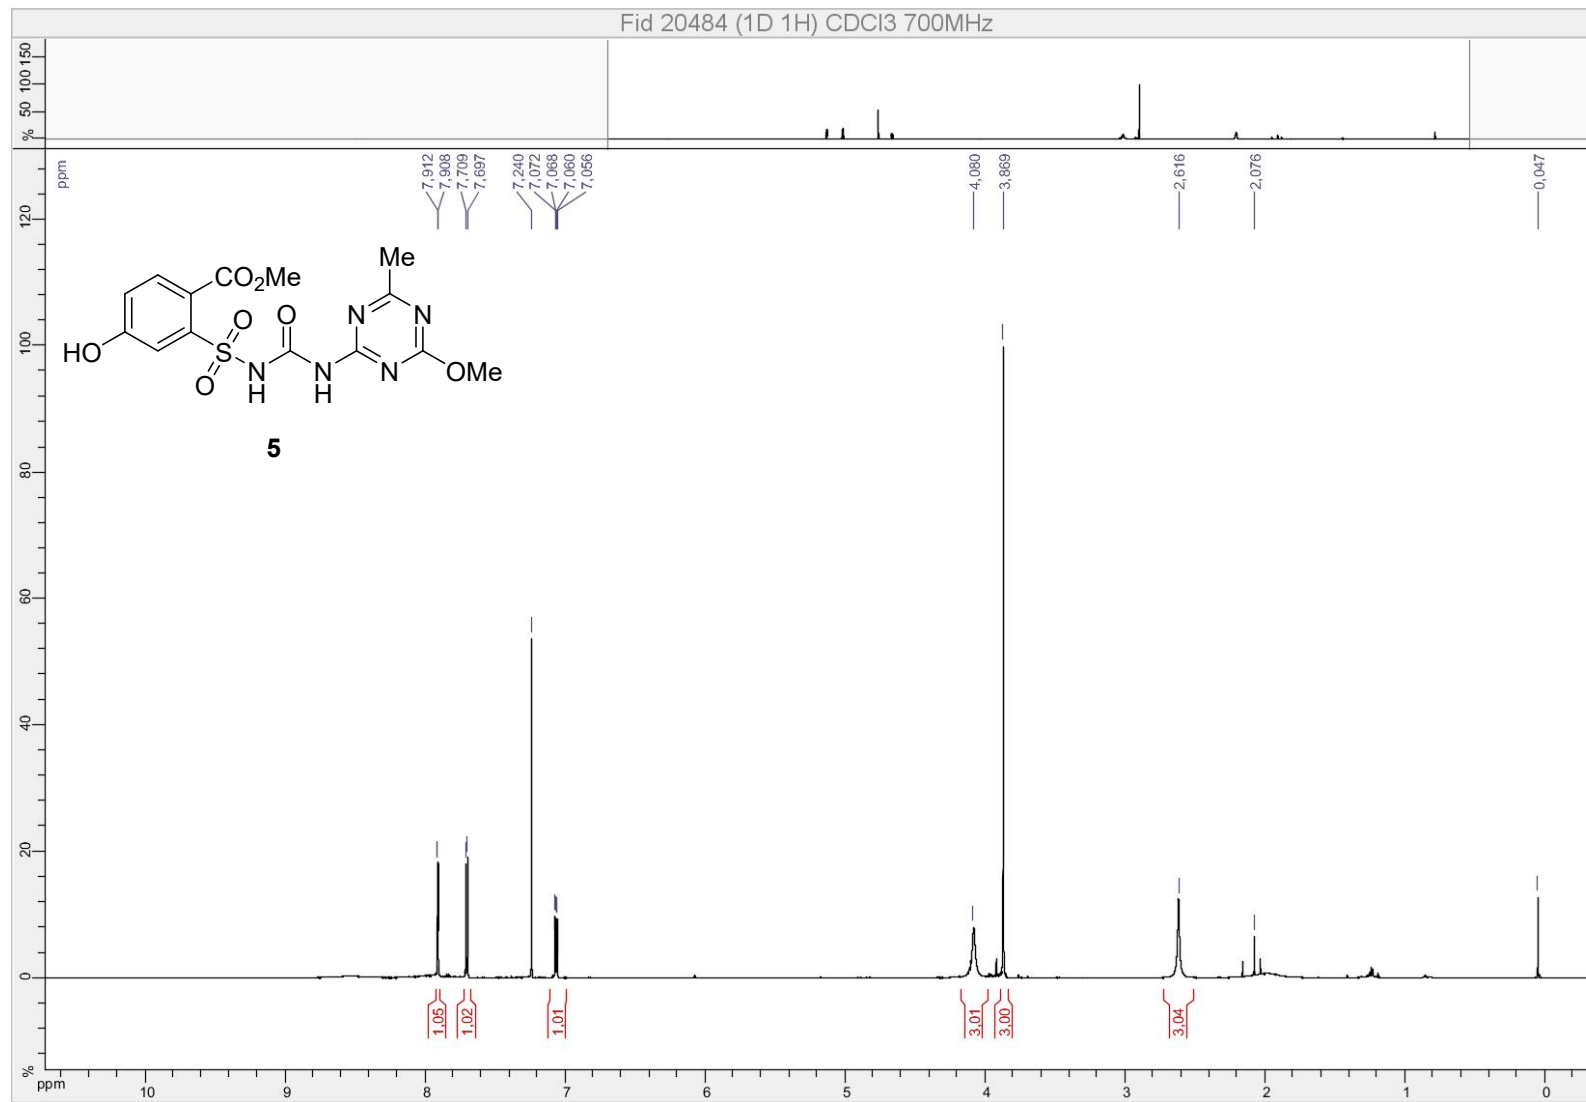

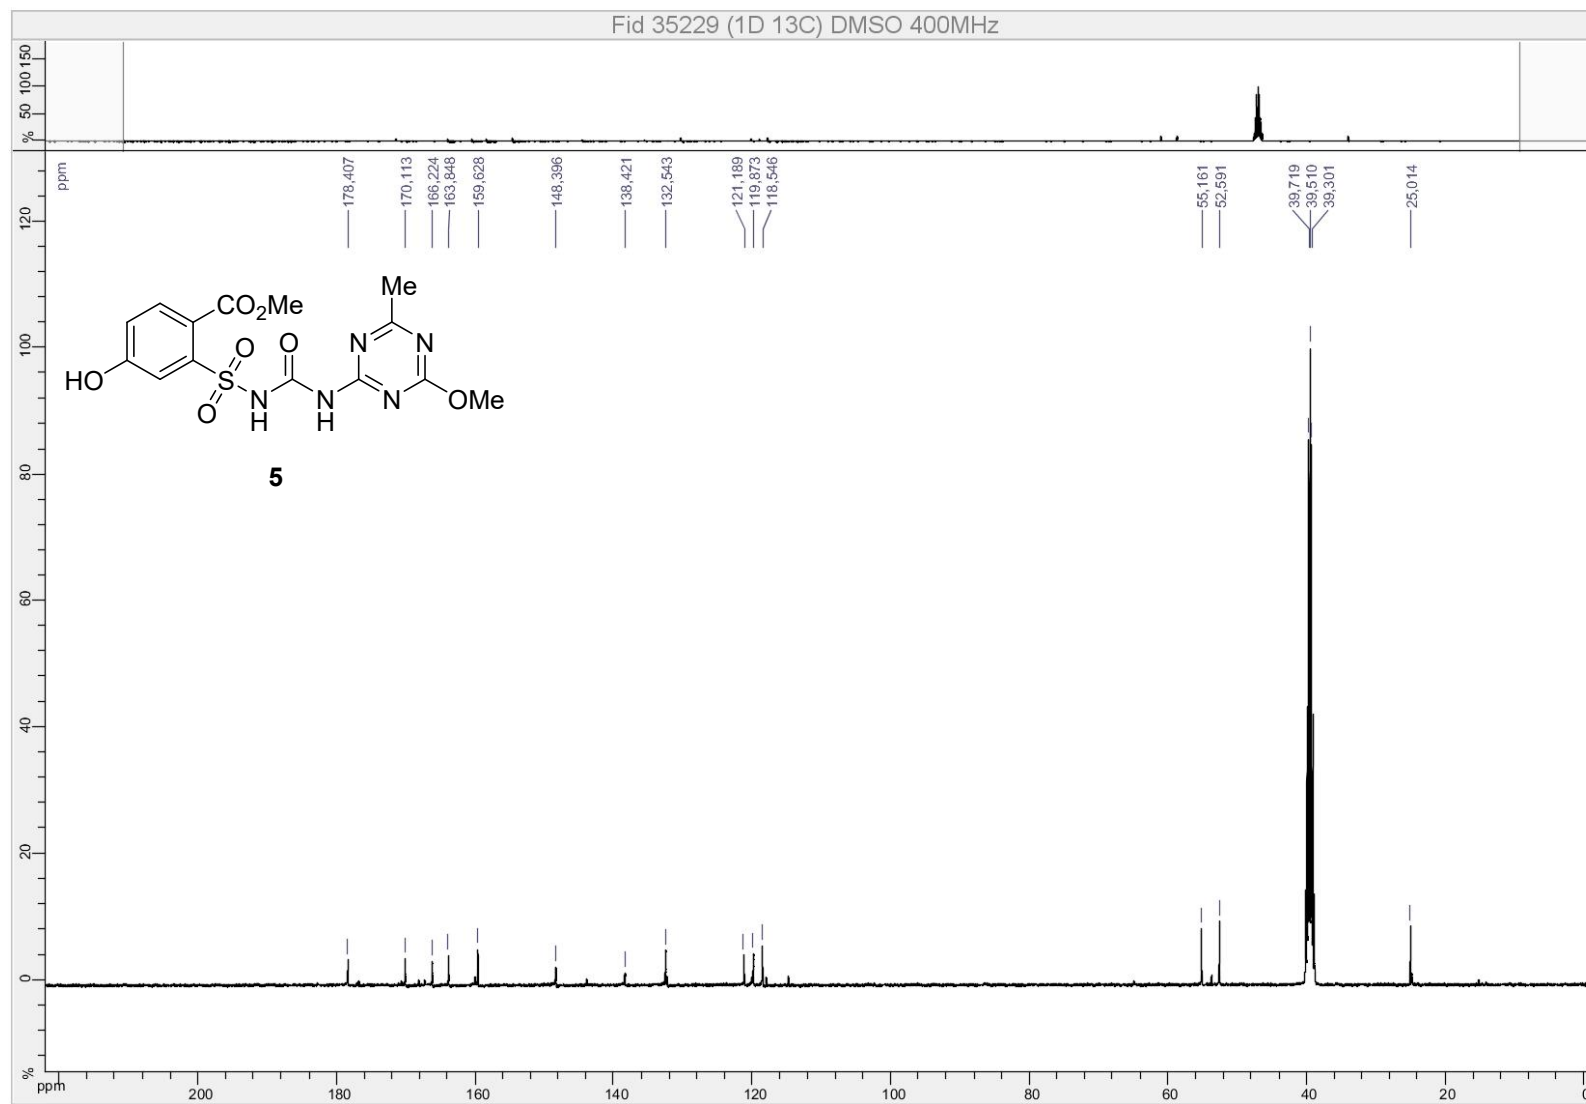

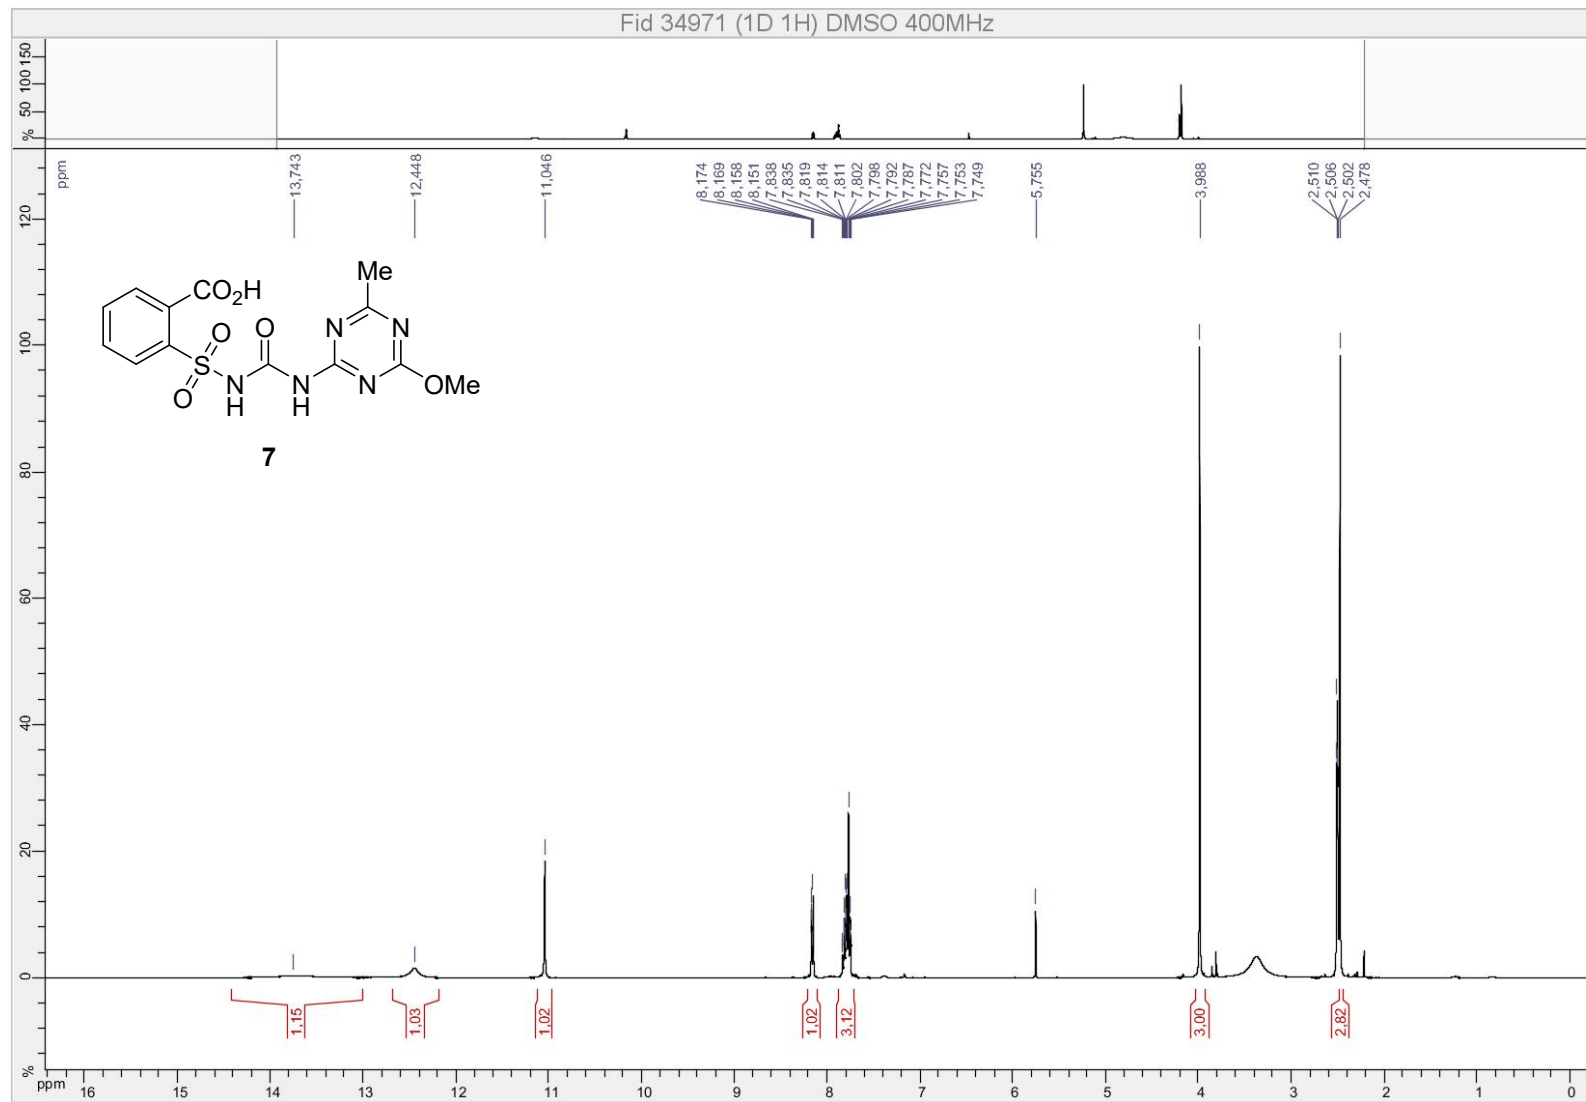

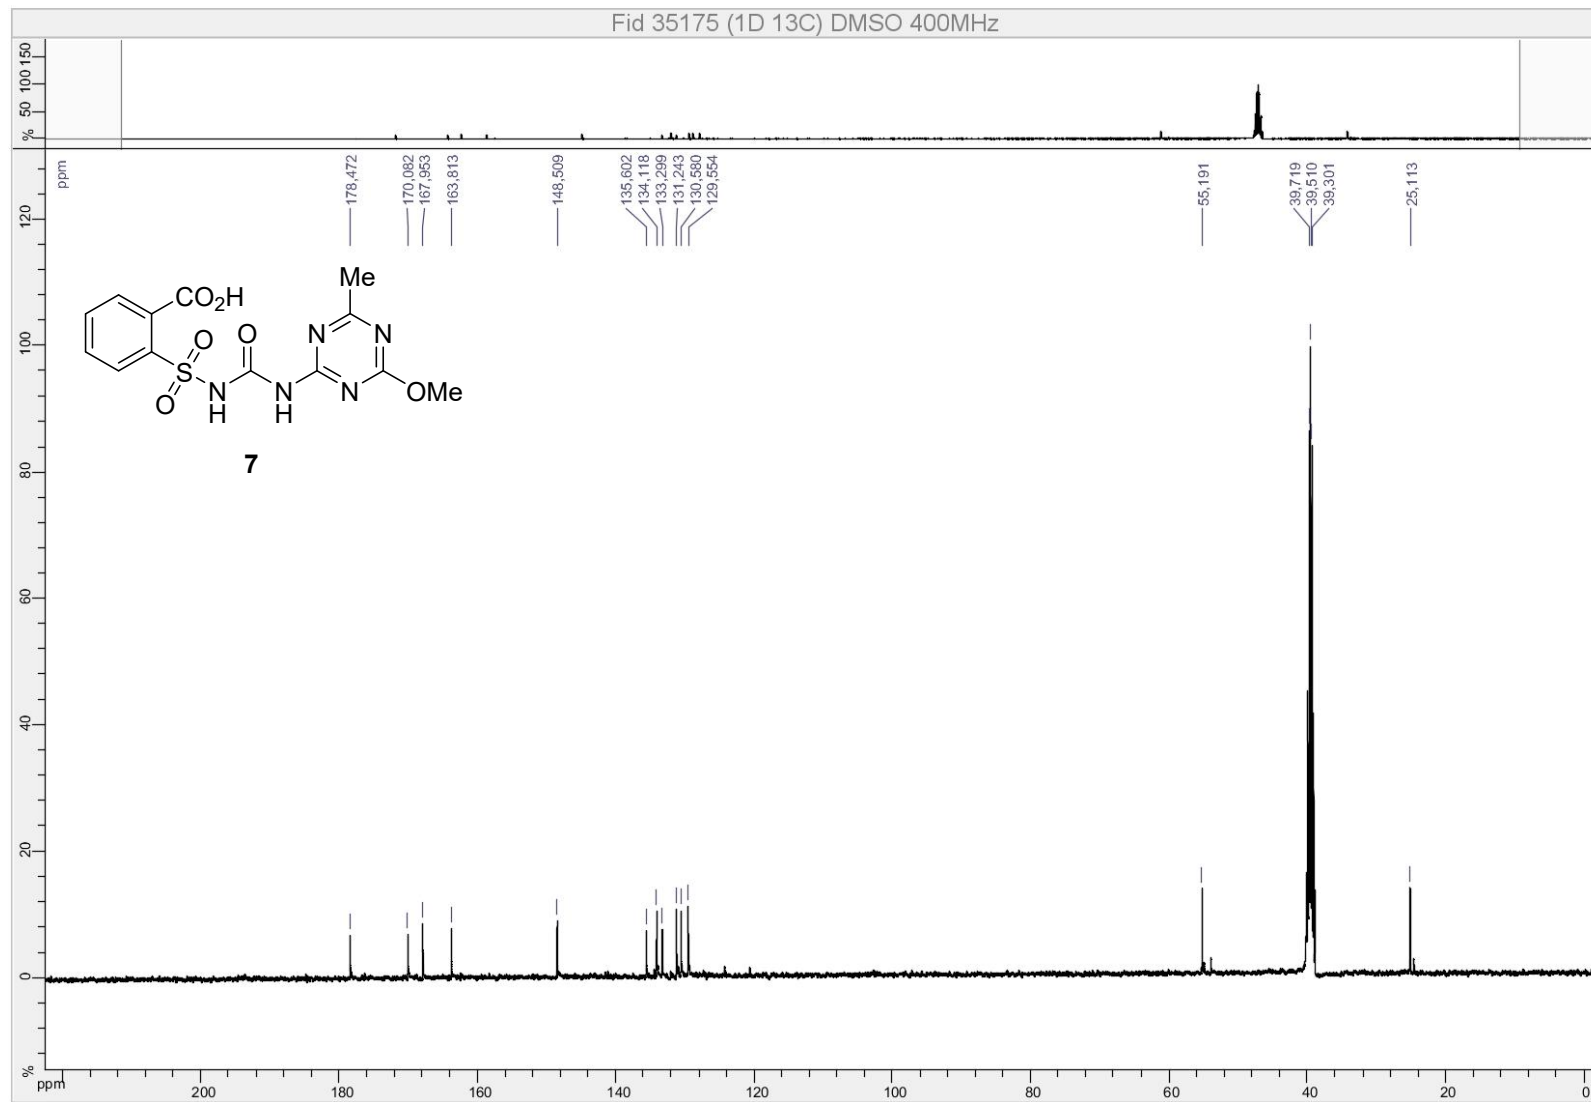



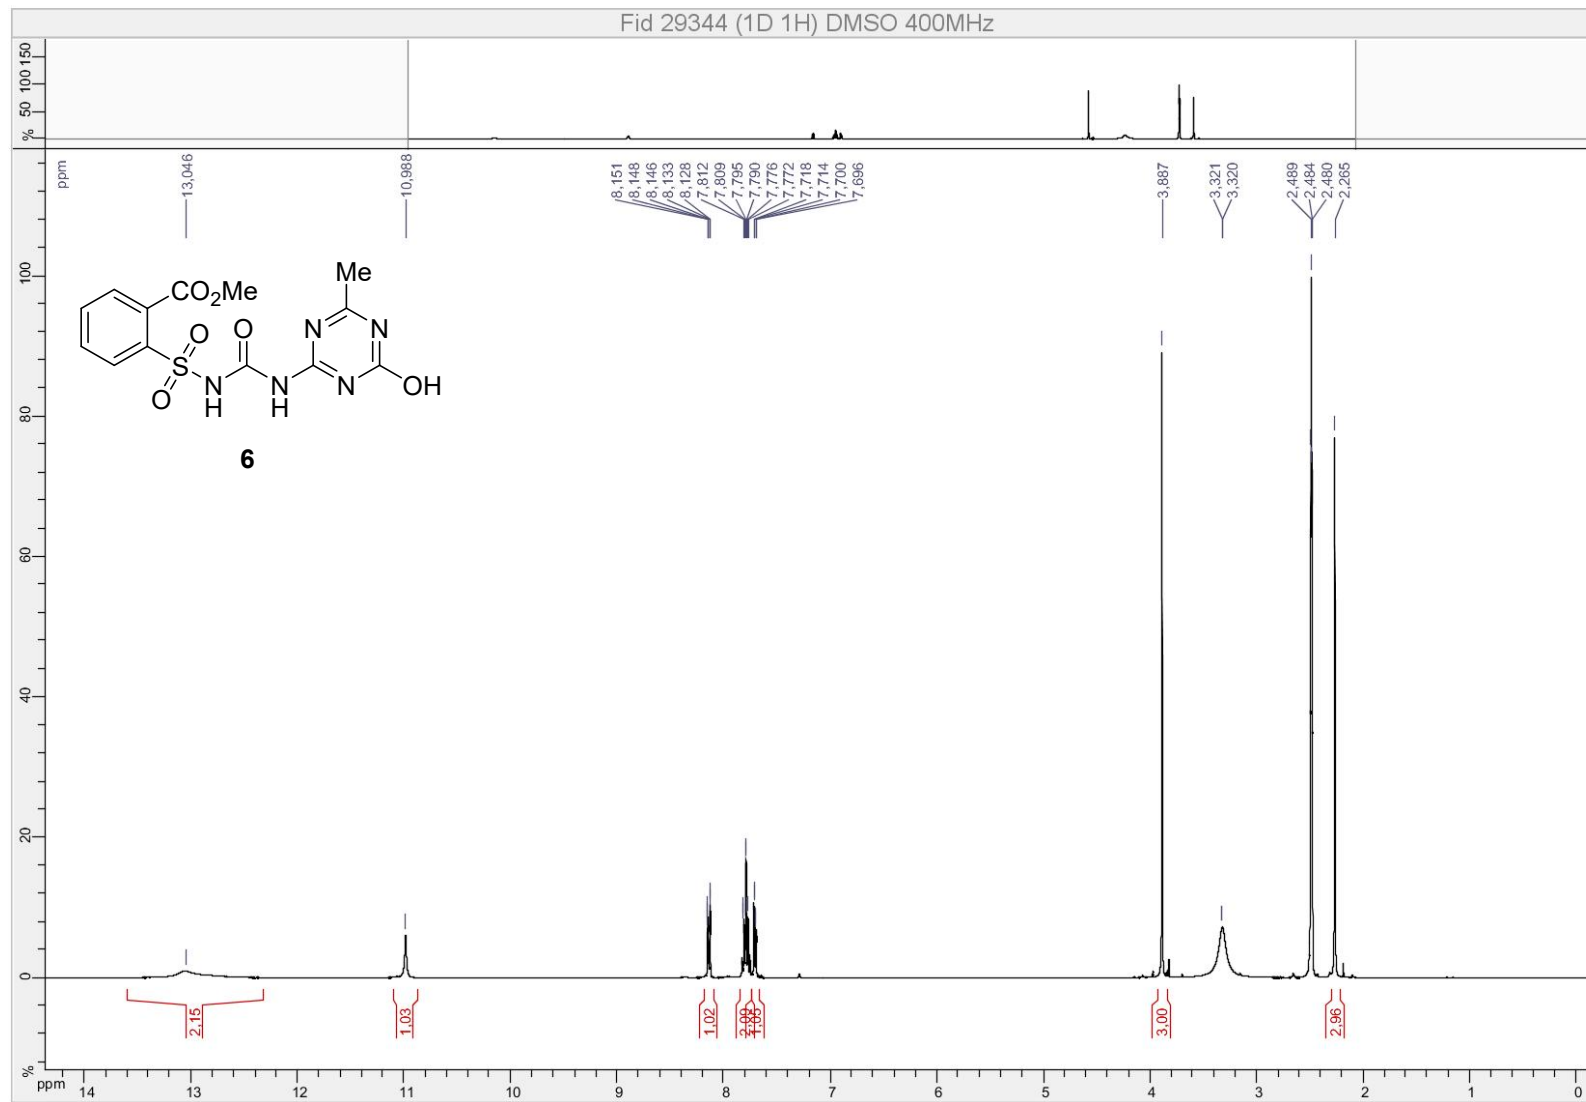

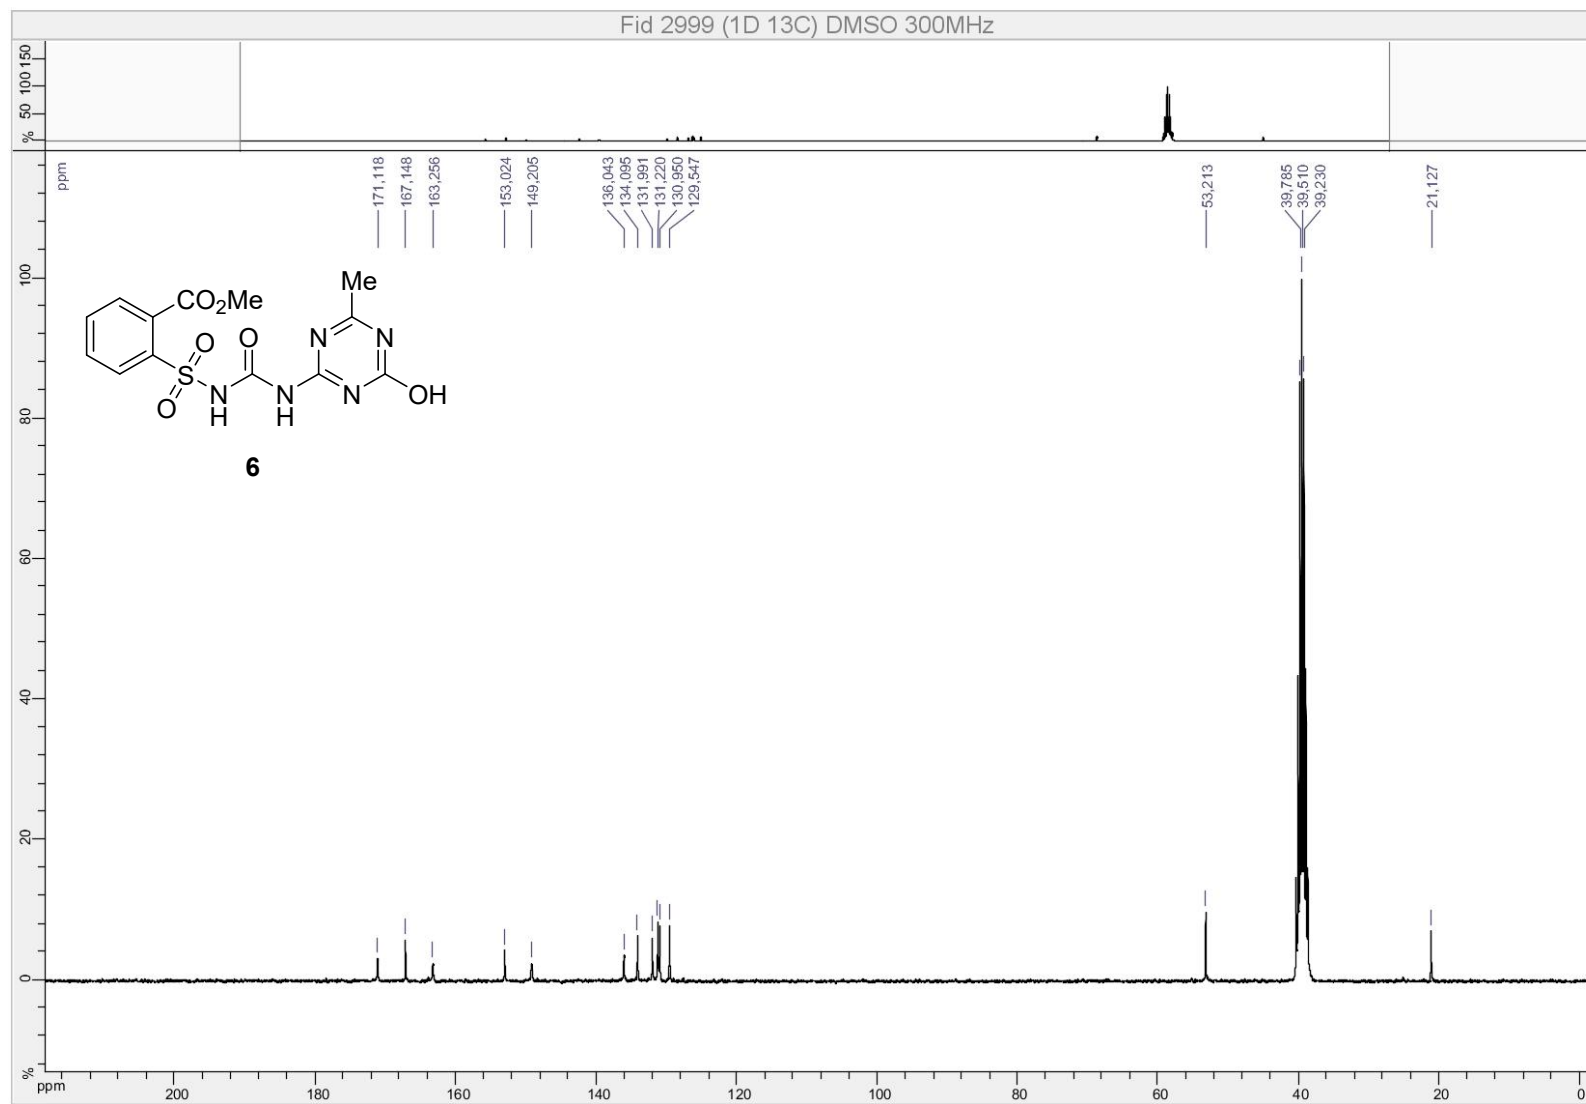

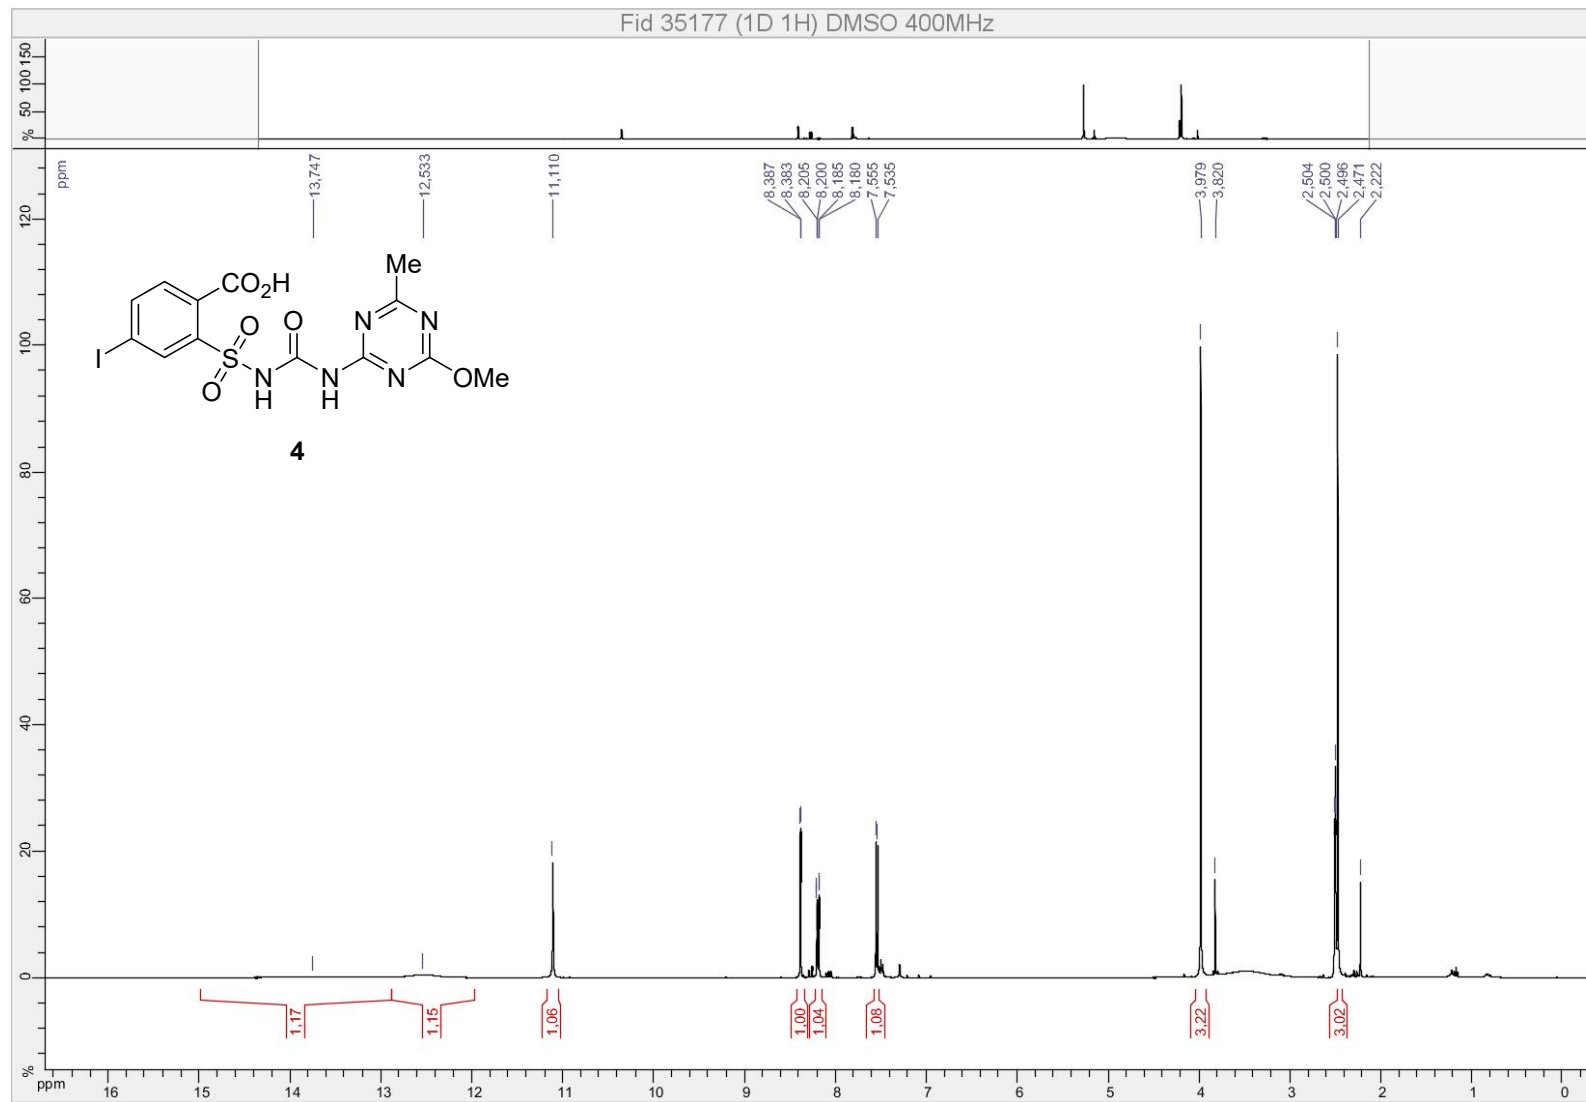

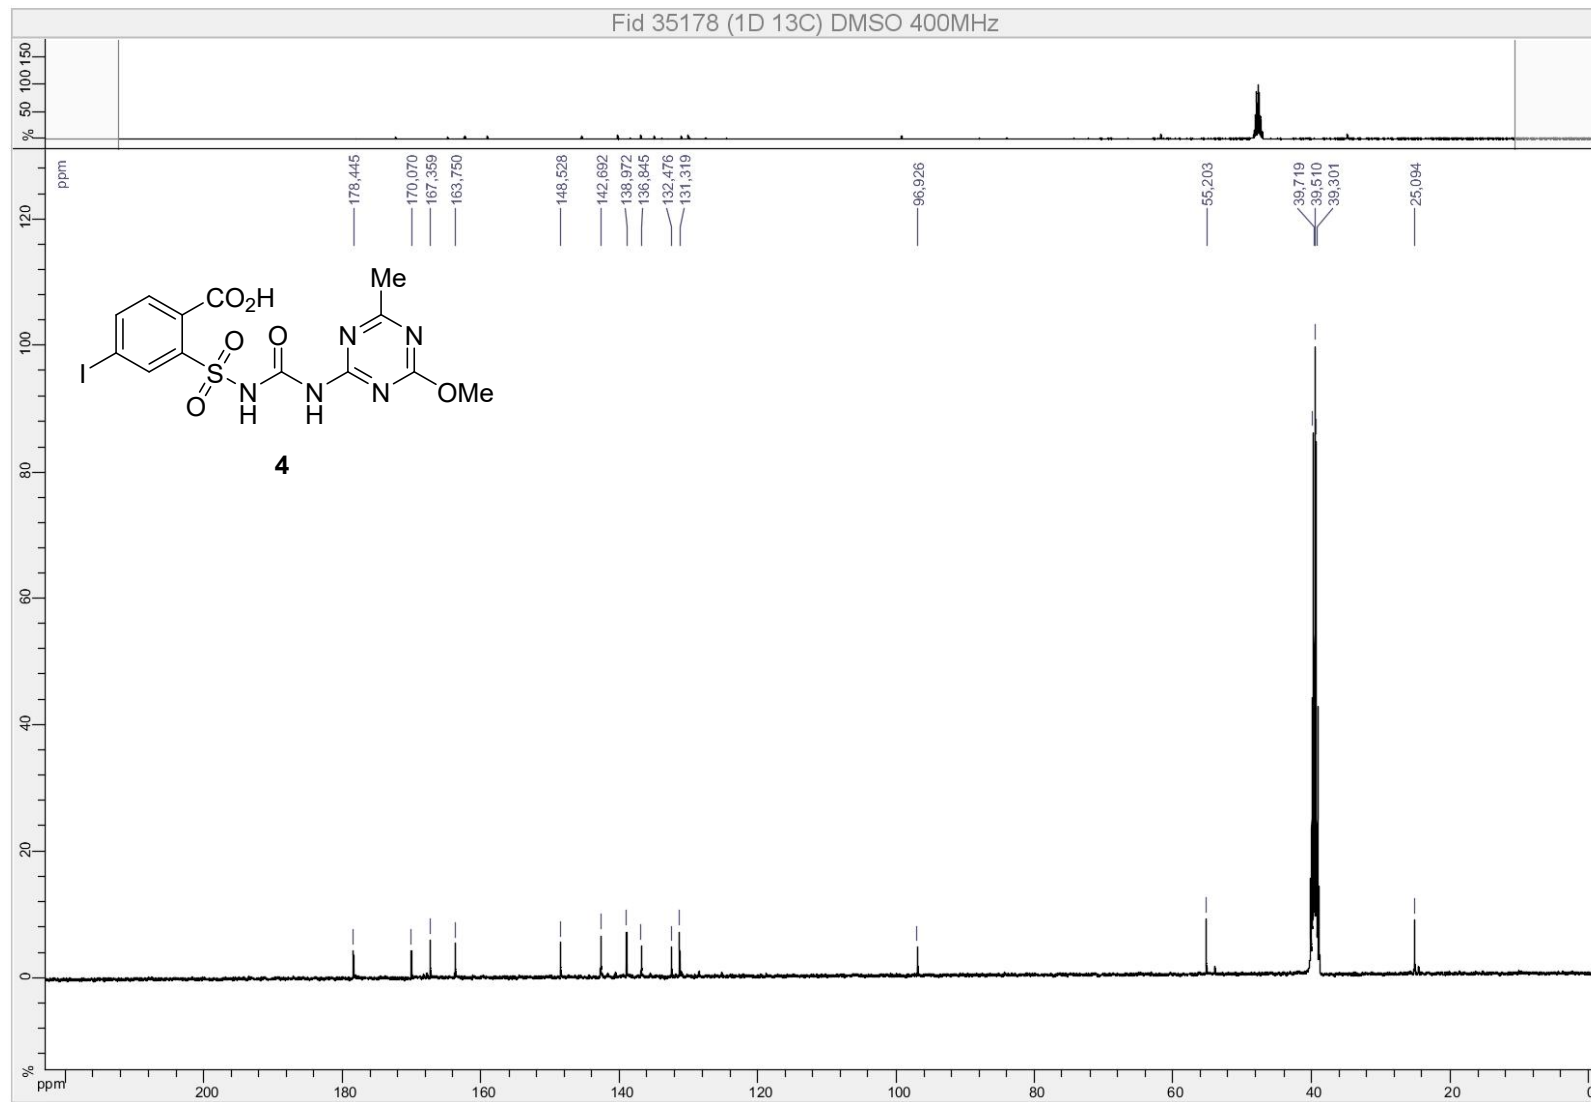

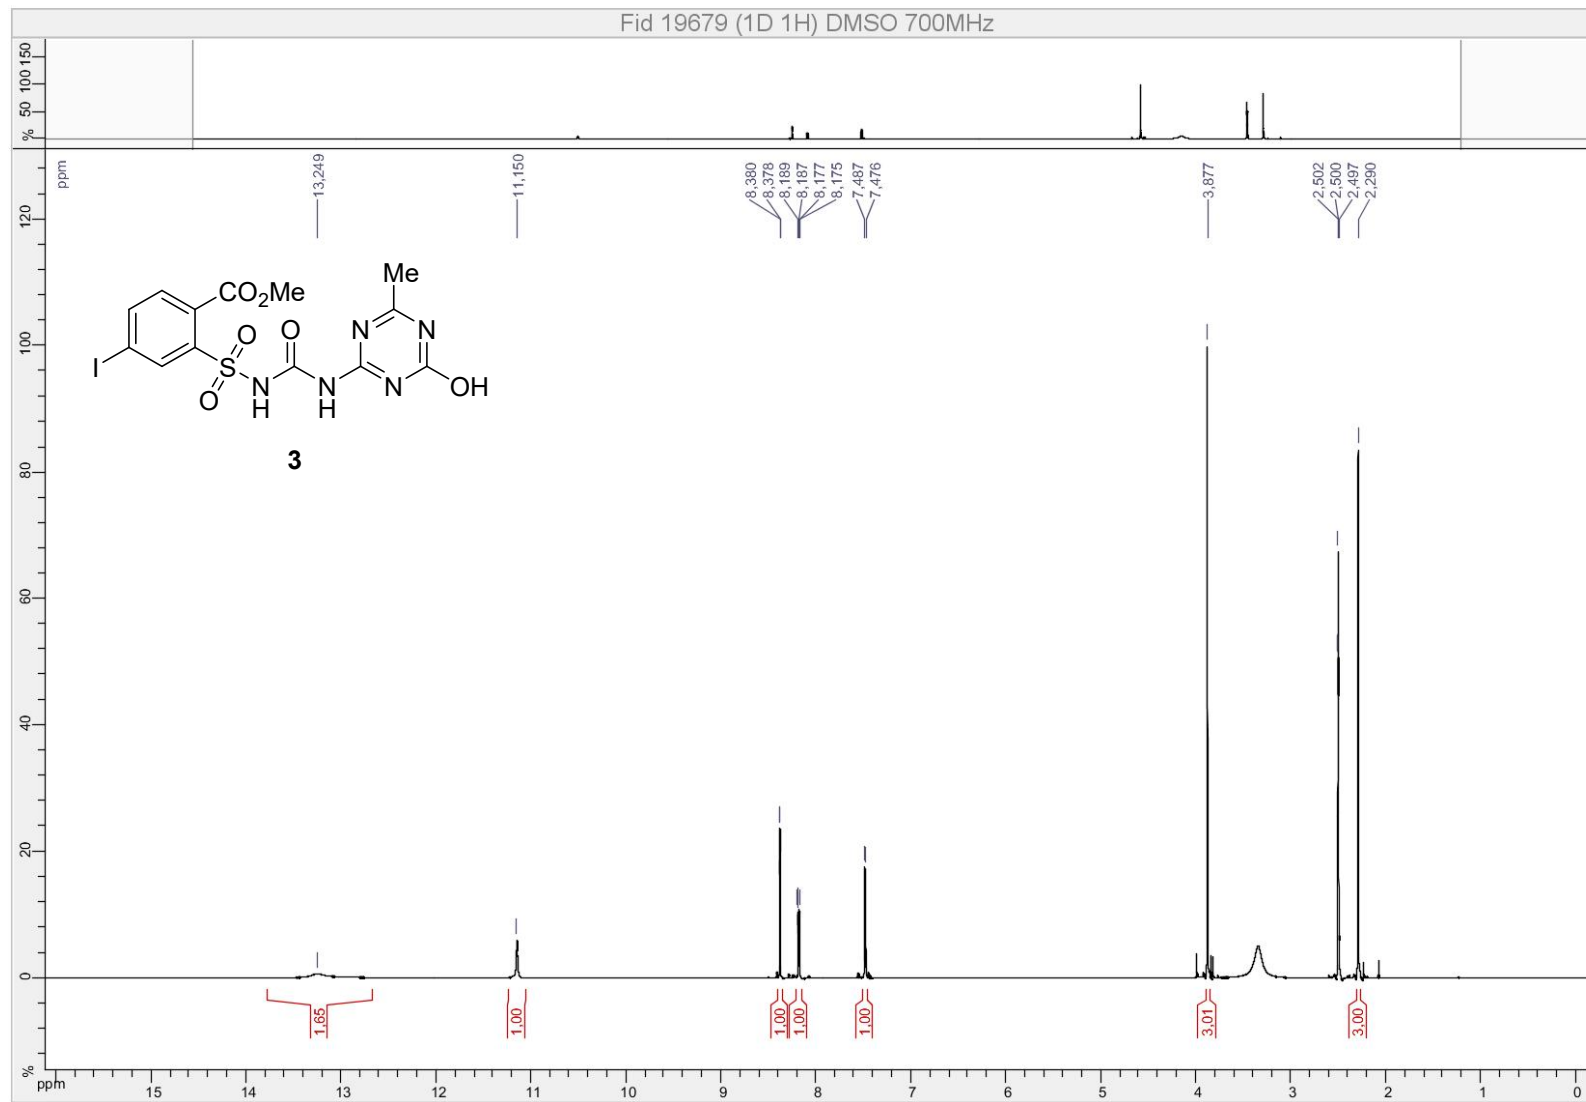

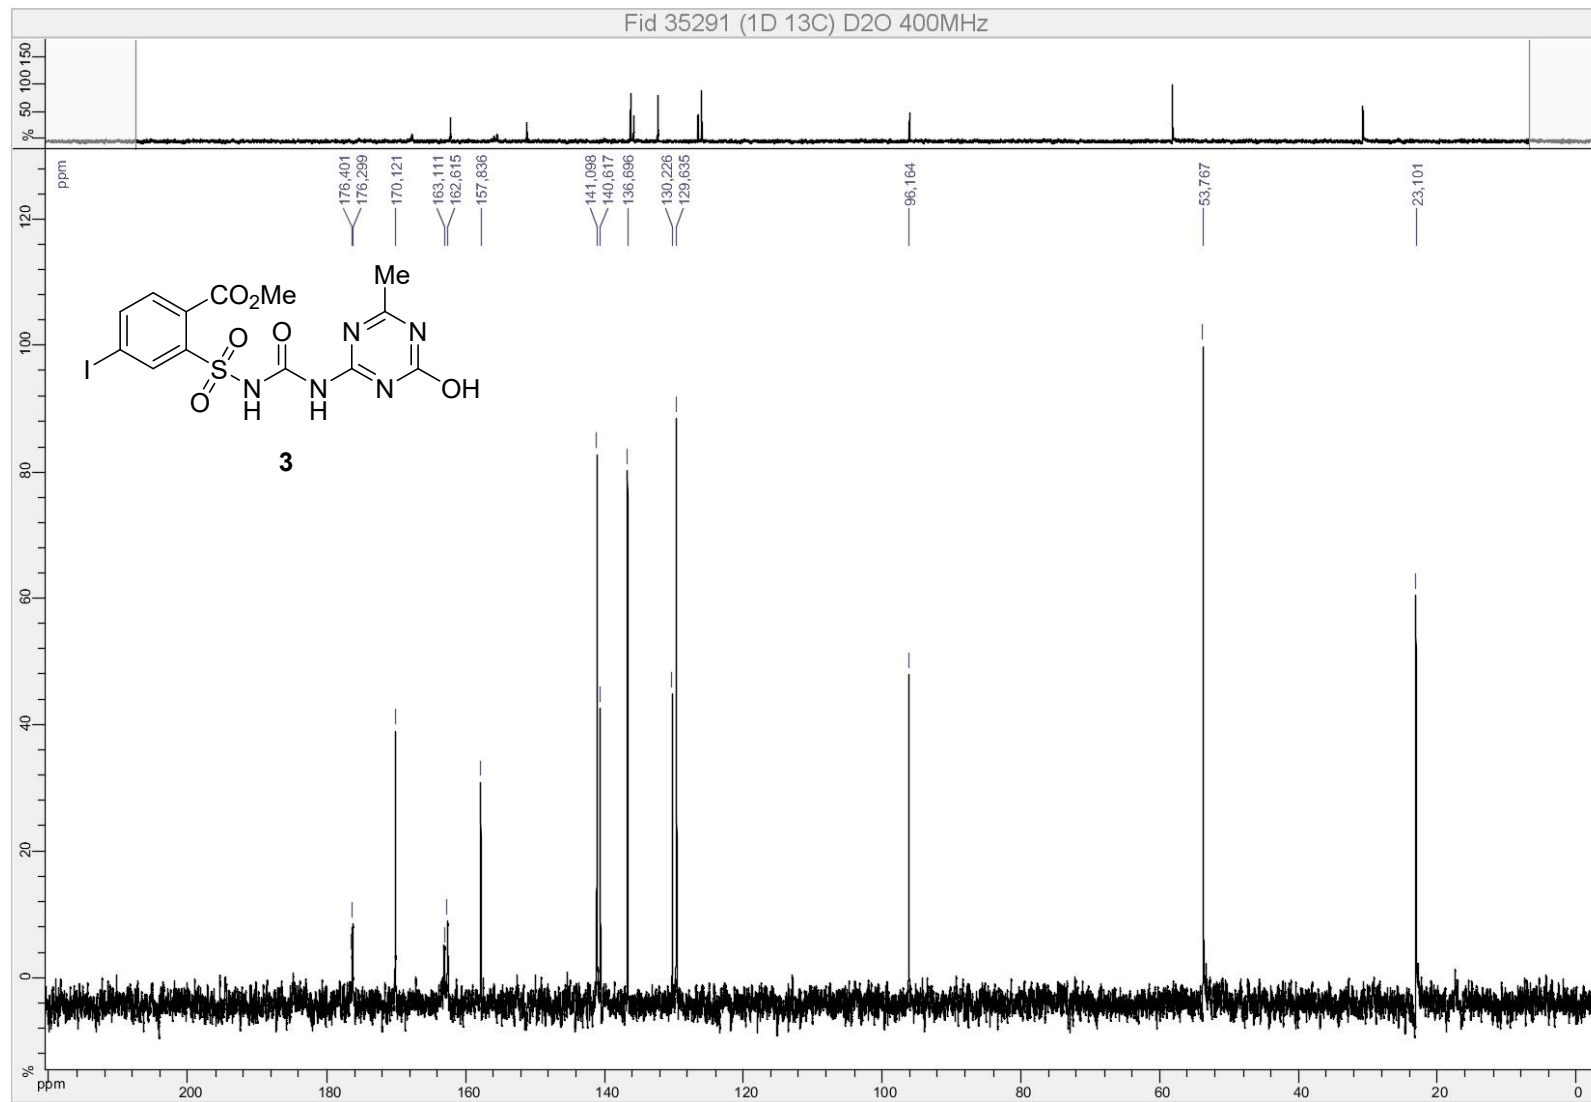

Supplement: d4ra01725k1.pdf [file d4ra01725k1.pdf]
